# Supplementary material for: Metagenomic Detection of Divergent Insect- and Bat-Associated Viruses in Plasma from Two African Individuals Enrolled in Blood-Borne Surveillance
Source: MDPI journal article supplement (doi:10.3390/v15041022), 2023-04-21
Supplement: s1 [file s1]

Supplementary information for:

# Metagenomic detection of divergent insect- and bat-associated viruses in plasma from two African individuals enrolled in blood-borne surveillance

Gregory S. Orf<sup>1,2</sup>, Ana Olivo<sup>1,2</sup>, Barbara Harris<sup>1,2</sup>, Sonja L. Weiss<sup>1,2</sup>, Asmeeta Achari<sup>2,3</sup>, Guixia Yu<sup>2,3</sup>, Scot Federman<sup>2,3</sup>, Dora Mbanya<sup>4</sup>, Linda James<sup>5</sup>, Samuel Mampunza<sup>5</sup>, Charles Y. Chiu<sup>2,3,6</sup>, Mary A. Rodgers<sup>1,2</sup>, Gavin A. Cloherty<sup>1,2</sup>, and Michael G. Berg<sup>1,2,\*</sup>

<sup>1</sup> Infectious Disease Research, Abbott Diagnostics, Abbott Park, IL, USA

<sup>2</sup> Abbott Pandemic Defense Coalition

<sup>3</sup> Department of Laboratory Medicine, University of California-San Francisco, San Francisco, CA, USA

<sup>4</sup> Faculty of Medicine and Biomedical Sciences, University of Yaoundé I, Yaoundé, Cameroon

<sup>5</sup> School of Medicine, Université Protestante au Congo, Kinshasa, DRC

<sup>6</sup> Department of Medicine, University of California-San Francisco, San Francisco, CA, USA

\* Correspondence: E-mail: michael.berg@abbott.com; Tel.: +1-224-668-0742

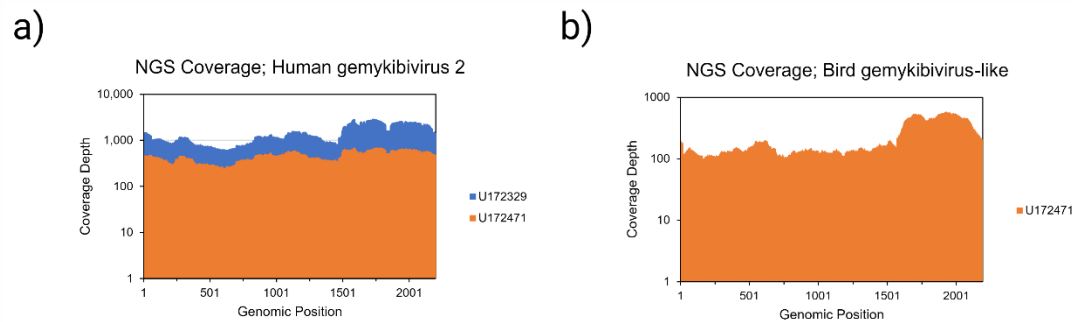

**Figure S1.** Genomic coverage statistics for the assembled gemycircularviruses (a) human gemykibivirus 2 and (b) bird-like gemykibivirus. The genomic coordinates are in the same orientation as the maps shown in the Main Text Figure 2.

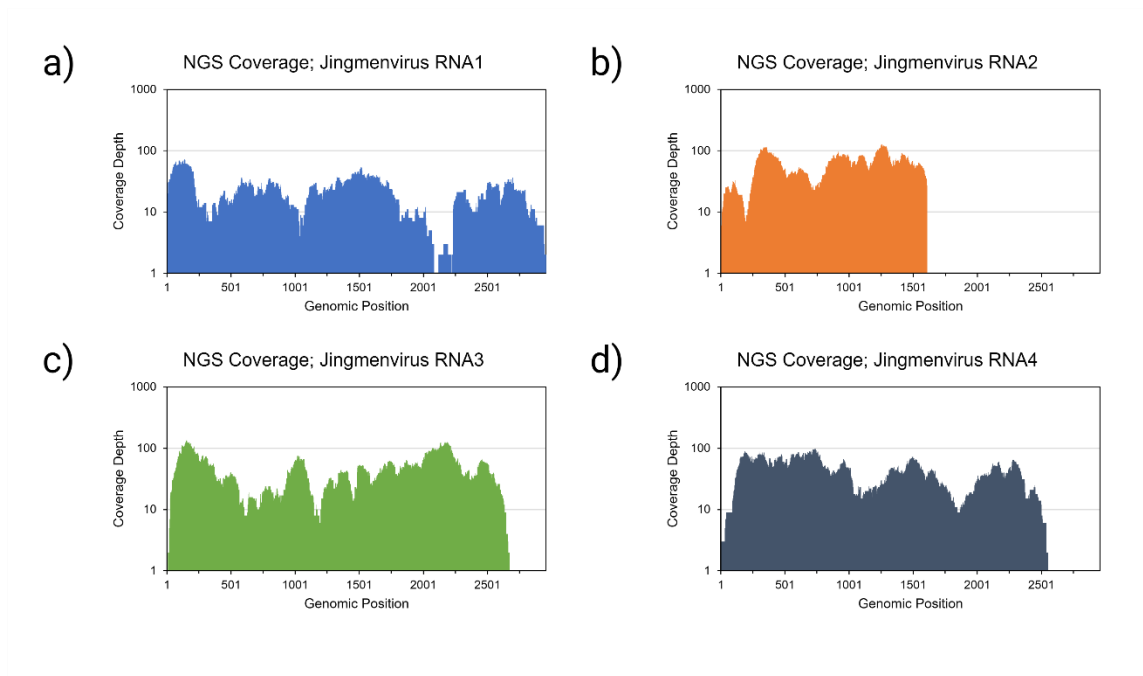

**Figure S2.** Genomic coverage statistics for the assembled Jingmanvirus; segments 1-4 (a-d). The genomic coordinates are in the same orientation as the maps shown in the Main Text Figure 2.

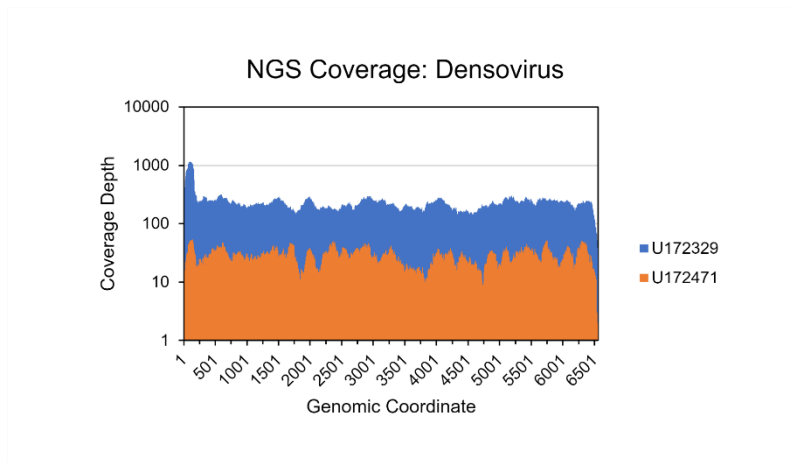

**Figure S3.** Genomic coverage statistics for the assembled dengovirus. The genomic coordinates are in the same orientation as the maps shown in the Main Text Figure 2.

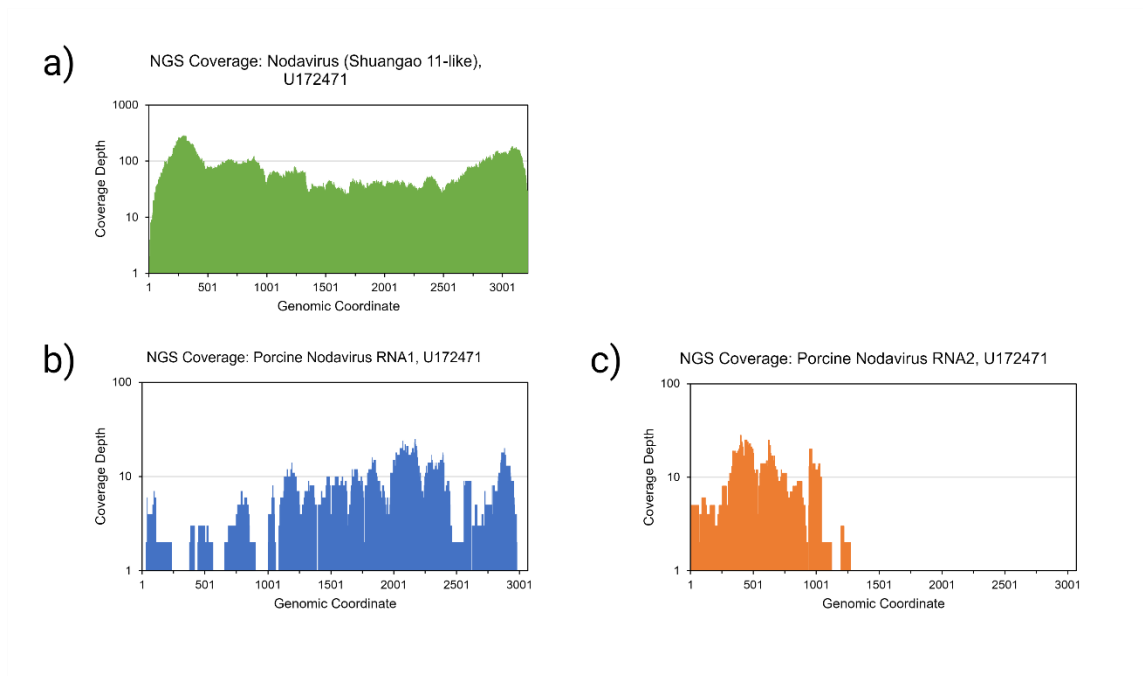

**Figure S4.** Genomic coverage statistics for the assembled nodaviruses: Shuangao 11-like virus (a) and Porcine nodavirus (b-c). The genomic coordinates are in the same orientation as the maps shown in the Main Text Figure 2.

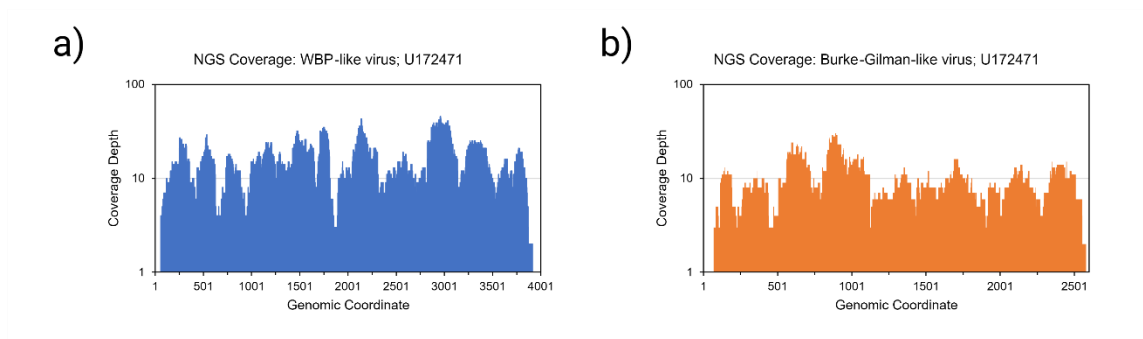

**Figure S5.** Genomic coverage statistics for the partially-assembled picornaviruses: Washington bat-like virus (a) and Burke-Gilman-like virus (b). The genomic coordinates relate to the assembled contig, not to the expected genome coordinate based on homology to other picornaviruses.

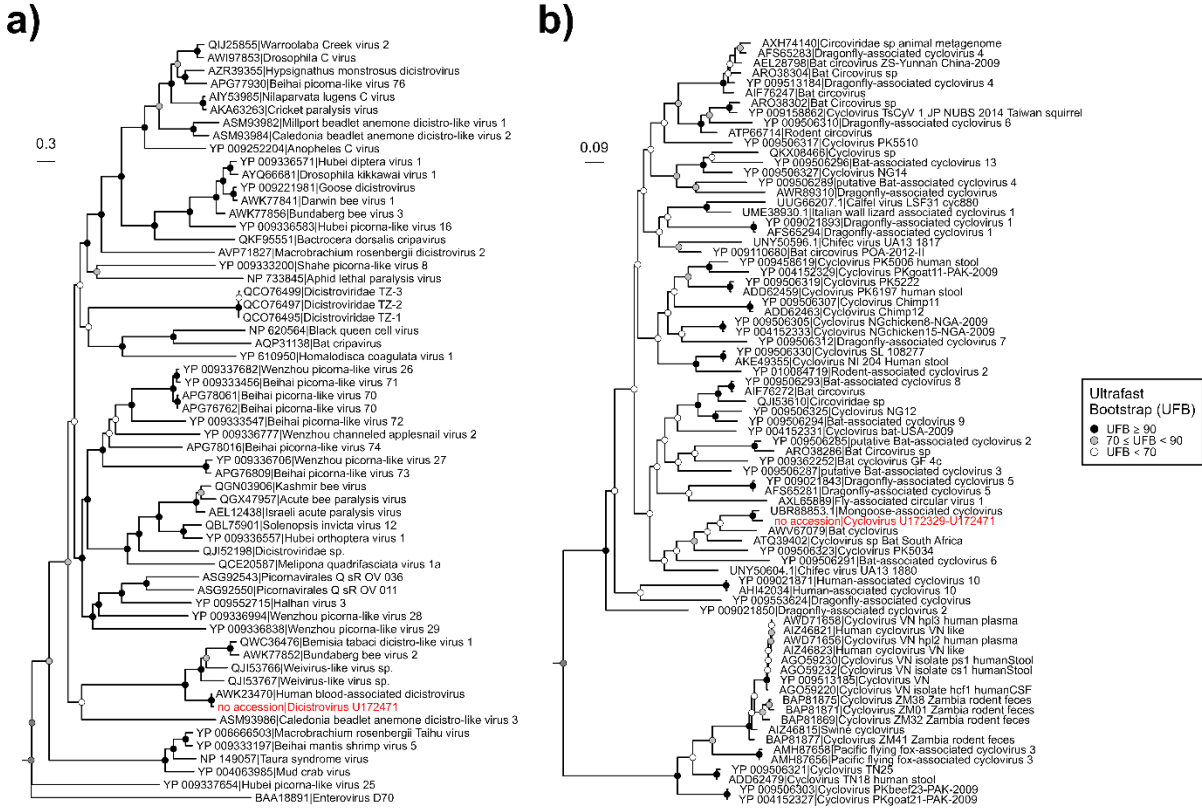

**Figure S6.** Maximum likelihood phylogenetic reconstruction of the ORF1 protein sequence of the dicistroviruses (**a**) and the Rep protein sequence of cycloviruses (**b**). Each tree is midpoint rooted and branch lengths are drawn to scale in terms of substitutions per site with the scale indicated in each panel. The input multiple sequence alignments were produced using the program MAFFT, with the E-INS-i algorithm used in panel (**a**) and the L-INS-i algorithm used in panel (**b**). Branching supports from 1000 replicates of Ultrafast Bootstrap (UFB) are shown as symbols at the nodes, with accompanying legend shown at right.

**Table S1.** List of accessions and metadata referring for the reference sequences from the phylum Pisuviricota utilized as a training set for the linear discriminant analysis shared in the Main Text, Figure 5a.

| ACCESSION | ORGANISM                                              | STRAIN                               | HOST                             | SEGMENT | CLASS           | ORDER          | FAMILY          | HOST RANGE    |
|-----------|-------------------------------------------------------|--------------------------------------|----------------------------------|---------|-----------------|----------------|-----------------|---------------|
| NC_002548 | Acute bee paralysis virus                             | NA                                   | Apis mellifera                   | NA      | Pisoniviricetes | Picornavirales | Dicistroviridae | Invertebrates |
| NC_038762 | Aeonium ringspot virus                                | Aeonium                              | Aeonium sp.                      | RNA1    | Pisoniviricetes | Picornavirales | Secoviridae     | Plants        |
| NC_038761 | Aeonium ringspot virus                                | NA                                   | Aeonium sp.                      | RNA2    | Pisoniviricetes | Picornavirales | Secoviridae     | Plants        |
| NC_026470 | African bat icavirus<br>PREDICT-06105                 | PREDICT-06105                        | Hipposideros gigas               | NA      | Pisoniviricetes | Picornavirales | Picornaviridae  | Vertebrates   |
| NC_043537 | African eggplant mosaic virus                         | 2013-281                             | Solanum aethiopicum              | NA      | Stelpaviricetes | Patatavirales  | Potyviridae     | Plants        |
| NC_034207 | African eggplant yellowing virus                      | eMA4                                 | Solanum aethiopicum              | NA      | Pisoniviricetes | Sobelivirales  | Solemoviridae   | Plants        |
| NC_005903 | Agropyron mosaic virus                                | ND402                                | NA                               | NA      | Stelpaviricetes | Patatavirales  | Potyviridae     | Plants        |
| NC_001918 | Aichi virus 1                                         | A846/88                              | Homo sapiens                     | NA      | Pisoniviricetes | Picornavirales | Picornaviridae  | Vertebrates   |
| NC_004421 | Aichivirus B                                          | U-1                                  | NA                               | NA      | Pisoniviricetes | Picornavirales | Picornaviridae  | Vertebrates   |
| NC_055161 | Aimelvirus 1                                          | gpai001                              | NA                               | NA      | Pisoniviricetes | Picornavirales | Picornaviridae  | Unknown       |
| NC_035198 | Aimelvirus 2                                          | gpai002                              | NA                               | NA      | Pisoniviricetes | Picornavirales | Picornaviridae  | Unknown       |
| NC_029993 | Alfalfa enamovirus 1                                  | Manfredi                             | alfalfa                          | NA      | Pisoniviricetes | Sobelivirales  | Solemoviridae   | Plants        |
| NC_010736 | Algerian watermelon mosaic virus                      | H4                                   | NA                               | NA      | Stelpaviricetes | Patatavirales  | Potyviridae     | Plants        |
| NC_046964 | Alphacoronavirus Bat-CoV/P.kuhlII/Italy /3398-19/2015 | Bat-CoV/P.kuhlII/Italy /3398-19/2015 | Pipistrellus kuhlii              | NA      | Pisoniviricetes | Nidovirales    | Cornidovirineae | Vertebrates   |
| NC_055493 | Alpinia oxyphylla mosaic virus                        | Alpo                                 | Alpinia oxyphylla                | NA      | Stelpaviricetes | Patatavirales  | Potyviridae     | Plants        |
| NC_006553 | anativirus A1                                         | TW90A                                | NA                               | NA      | Pisoniviricetes | Picornavirales | Picornaviridae  | Vertebrates   |
| NC_038744 | Andean potato mottle virus                            | C                                    | NA                               | NA      | Pisoniviricetes | Picornavirales | Secoviridae     | Plants        |
| NC_030115 | Anopheles C virus                                     | Ngouso                               | Anopheles coluzzii               | NA      | Pisoniviricetes | Picornavirales | Dicistroviridae | Invertebrates |
| NC_030232 | Antarctic picorna-like virus 1                        | APLV1                                | unknown                          | NA      | Pisoniviricetes | Picornavirales | environmental   | Unknown       |
| NC_030233 | Antarctic picorna-like virus 2                        | APLV2                                | unknown                          | NA      | Pisoniviricetes | Picornavirales | environmental   | Unknown       |
| NC_030234 | Antarctic picorna-like virus 3                        | APLV3                                | unknown                          | NA      | Pisoniviricetes | Picornavirales | environmental   | Unknown       |
| NC_030235 | Antarctic picorna-like virus 4                        | APLV4                                | unknown                          | NA      | Pisoniviricetes | Picornavirales | environmental   | Unknown       |
| NC_023483 | Antheraea pernyi iflavivirus                          | LnApIV-02                            | Antheraea pernyi                 | NA      | Pisoniviricetes | Picornavirales | Iflaviridae     | Invertebrates |
| NC_004365 | Aphid lethal paralysis virus                          | NA                                   | NA                               | NA      | Pisoniviricetes | Picornavirales | Dicistroviridae | Invertebrates |
| NC_034973 | Aphis glycines virus 3                                | S6-1A                                | Aphis glycines                   | NA      | Pisoniviricetes | Picornavirales | Dicistroviridae | Invertebrates |
| NC_035115 | Apis dicistrovirus                                    | AWD-1151                             | Apis mellifera                   | NA      | Pisoniviricetes | Picornavirales | Dicistroviridae | Invertebrates |
| NC_014905 | Apium virus Y                                         | Ce                                   | Apium graveolens                 | NA      | Stelpaviricetes | Patatavirales  | Potyviridae     | Plants        |
| NC_003787 | Apple latent spherical virus                          | NA                                   | NA                               | RNA 1   | Pisoniviricetes | Picornavirales | Secoviridae     | Plants        |
| NC_003788 | Apple latent spherical virus                          | NA                                   | NA                               | RNA 2   | Pisoniviricetes | Picornavirales | Secoviridae     | Plants        |
| NC_043411 | Apricot latent ringspot virus                         | Modesto                              | NA                               | NA      | Pisoniviricetes | Picornavirales | Secoviridae     | Plants        |
| NC_006057 | Arabid mosaic virus                                   | Neustadt an der Weinstrasse (NW)     | grapevine 'Pinot gris'           | RNA 1   | Pisoniviricetes | Picornavirales | Secoviridae     | Plants        |
| NC_006056 | Arabid mosaic virus                                   | NW                                   | grapevine cultivar Pinot gris    | RNA 2   | Pisoniviricetes | Picornavirales | Secoviridae     | Plants        |
| NC_055501 | Areca palm necrotic ringspot virus                    | XC1                                  | Areca catechu (palm)             | NA      | Stelpaviricetes | Patatavirales  | Potyviridae     | Plants        |
| NC_040836 | Areca palm necrotic spindle-spot virus                | HNBT                                 | areca palm                       | NA      | Stelpaviricetes | Patatavirales  | Potyviridae     | Plants        |
| NC_036585 | Armigeres iflavivirus                                 | 10P38-310                            | Armigeres spp.                   | NA      | Pisoniviricetes | Picornavirales | Iflaviridae     | Invertebrates |
| NC_018176 | Arracacha mottle virus                                | C-17                                 | Arracacia xanthorrhiza           | NA      | Stelpaviricetes | Patatavirales  | Potyviridae     | Plants        |
| NC_020898 | Arracacha virus B                                     | PV-0082                              | Oxalis tuberosa                  | RNA 1   | Pisoniviricetes | Picornavirales | Secoviridae     | Plants        |
| NC_020897 | Arracacha virus B                                     | oca                                  | Oxalis tuberosa                  | RNA 2   | Pisoniviricetes | Picornavirales | Secoviridae     | Plants        |
| NC_017914 | Artemisia virus A                                     | NA                                   | Artemisia annua                  | NA      | Pisoniviricetes | Sobelivirales  | Solemoviridae   | Plants        |
| NC_043685 | Artichoke Italian latent virus                        | AILV-V                               | NA                               | RNA 2   | Pisoniviricetes | Picornavirales | Secoviridae     | Plants        |
| NC_043684 | Artichoke Italian latent virus                        | AILV-V                               | NA                               | RNA 1   | Pisoniviricetes | Picornavirales | Secoviridae     | Plants        |
| NC_026759 | Artichoke latent virus                                | FR37                                 | artichoke; cv. Camus de Bretagne | NA      | Stelpaviricetes | Patatavirales  | Potyviridae     | Plants        |
| NC_038862 | Artichoke yellow ringspot virus                       | NA                                   | NA                               | NA      | Pisoniviricetes | Picornavirales | Secoviridae     | Plants        |
| NC_025821 | Asparagus virus 1                                     | DSMZ PV-0954                         | NA                               | NA      | Stelpaviricetes | Patatavirales  | Potyviridae     | Plants        |
| NC_024489 | Asterionellopsis glacialis RNA virus                  | AglaRNAV                             | NA                               | NA      | Pisoniviricetes | Picornavirales | Marnaviridae    | Chromista     |

|           |                                             |                               |                                             |       |                 |                |                 |             |
|-----------|---------------------------------------------|-------------------------------|---------------------------------------------|-------|-----------------|----------------|-----------------|-------------|
| NC_043416 | Astrovirus dogfaeces/Italy/2005             | 44625                         | NA                                          | NA    | Stelpaviricetes | Stellavirales  | Astroviridae    | Vertebrates |
| NC_027426 | Astrovirus Er/SZAL6/HUN/2011                | Er/SZAL6/HUN/2011             | Coracias garrulus (European roller)         | NA    | Stelpaviricetes | Stellavirales  | Astroviridae    | Vertebrates |
| NC_011400 | Astrovirus MLB1                             | MLB1                          | NA                                          | NA    | Stelpaviricetes | Stellavirales  | Astroviridae    | Vertebrates |
| NC_016155 | Astrovirus MLB2                             | MLB2/human/Stl/WD0559/2008    | Homo sapiens                                | NA    | Stelpaviricetes | Stellavirales  | Astroviridae    | Vertebrates |
| NC_019028 | Astrovirus MLB3                             | MLB3/human/Vellore/26564/2004 | Homo sapiens                                | NA    | Stelpaviricetes | Stellavirales  | Astroviridae    | Vertebrates |
| NC_013060 | Astrovirus VA1                              | VA1                           | Homo sapiens                                | NA    | Stelpaviricetes | Stellavirales  | Astroviridae    | Vertebrates |
| NC_019026 | Astrovirus VA3                              | VA3/human/Vellore/28054/2005  | Homo sapiens                                | NA    | Stelpaviricetes | Stellavirales  | Astroviridae    | Vertebrates |
| NC_019027 | Astrovirus VA4                              | VA4/human/Nepal/55363/2008    | Homo sapiens                                | NA    | Stelpaviricetes | Stellavirales  | Astroviridae    | Vertebrates |
| NC_016896 | Astrovirus wild boar/WBAstV-1/2011/HUN      | wild boar/WBAstV-1/2011/HUN   | Sus scrofa (wild boar)                      | NA    | Stelpaviricetes | Stellavirales  | Astroviridae    | Vertebrates |
| NC_024031 | Atlantic salmon calicivirus                 | Nordland/2011                 | Salmo salar L. (Atlantic salmon)            | NA    | Pisoniviricetes | Picornavirales | Caliciviridae   | Vertebrates |
| NC_003990 | tremovirus A1                               | Calnek                        | NA                                          | NA    | Pisoniviricetes | Picornavirales | Picornaviridae  | Vertebrates |
| NC_001451 | Infectious bronchitis virus                 | Beaudette                     | NA                                          | NA    | Pisoniviricetes | Nidovirales    | Cornidovirineae | Vertebrates |
| NC_028970 | Avisivirus Pf-CHK1/AsV                      | Pf-CHK1/AsV                   | Gallus gallus domesticus (domestic chicken) | NA    | Pisoniviricetes | Picornavirales | Picornaviridae  | Vertebrates |
| NC_034206 | kunsagivirus C1                             | baboon/M27-KuV/1986/TAN07-53  | Papio cynocephalus Python regius            | NA    | Pisoniviricetes | Picornavirales | Picornaviridae  | Vertebrates |
| NC_024709 | Ball python nidovirus 1                     |                               |                                             | NA    | Pisoniviricetes | Nidovirales    | Tornidovirineae | Vertebrates |
| NC_009745 | Banana bract mosaic virus                   | NA                            | banana                                      | NA    | Stelpaviricetes | Patatavirales  | Potyviridae     | Plants      |
| NC_030847 | Barbacena virus Y                           | KLL097                        | weed                                        | NA    | Stelpaviricetes | Patatavirales  | Potyviridae     | Plants      |
| NC_003483 | Barley mild mosaic virus                    | UK-F                          | barley                                      | RNA 1 | Stelpaviricetes | Patatavirales  | Potyviridae     | Plants      |
| NC_003482 | Barley mild mosaic virus                    | UK-F                          | barley                                      | RNA 2 | Stelpaviricetes | Patatavirales  | Potyviridae     | Plants      |
| NC_029906 | Barley virus G                              | Gimje                         | barley                                      | NA    | Pisoniviricetes | Sobelivirales  | Solemoviridae   | Plants      |
| NC_039035 | Barley yellow dwarf virus GPV               | 05YC3                         | NA                                          | NA    | Pisoniviricetes | Sobelivirales  | Solemoviridae   | Plants      |
| NC_043124 | Barley yellow dwarf virus SGV               | SGV                           | NA                                          | NA    | Pisoniviricetes | Sobelivirales  | Solemoviridae   | Plants      |
| NC_002990 | Barley yellow mosaic virus                  | Yancheng                      | barley                                      | RNA 1 | Stelpaviricetes | Patatavirales  | Potyviridae     | Plants      |
| NC_002991 | Barley yellow mosaic virus                  | Yancheng                      | barley                                      | RNA 2 | Stelpaviricetes | Patatavirales  | Potyviridae     | Plants      |
| NC_009741 | Basella rugose mosaic virus                 | AC                            | Anredera cordifolia (Madeira vine)          | NA    | Stelpaviricetes | Patatavirales  | Potyviridae     | Plants      |
| NC_035758 | Bastrovirus 7                               | NA                            | Homo sapiens                                | NA    | Stelpaviricetes | Stellavirales  | Astroviridae    | Unknown     |
| NC_032426 | Bastrovirus-like_virus/VietNam/Bat/17819_21 | 17819_21                      | Bat                                         | NA    | Stelpaviricetes | Stellavirales  | Astroviridae    | Unknown     |
| NC_035471 | Bastrovirus/VietNam/Bat/16715_78            | 16715_78                      | Bat                                         | NA    | Stelpaviricetes | Stellavirales  | Astroviridae    | Unknown     |
| NC_032423 | Bastrovirus/VietNam/Porcine/17489_85        | 17489_85                      | porcine                                     | NA    | Stelpaviricetes | Stellavirales  | Astroviridae    | Unknown     |
| NC_032484 | Bastrovirus/VietNam/Rat/16715_10            | 16715_10                      | rat                                         | NA    | Stelpaviricetes | Stellavirales  | Astroviridae    | Unknown     |
| NC_038368 | Bat astrovirus Hp/Guangxi/LC03/2007         | LC03                          | Hipposideros pomona                         | NA    | Stelpaviricetes | Stellavirales  | Astroviridae    | Vertebrates |
| NC_043103 | Bat astrovirus Tm/Guangxi/LD3/8/2007        | LD38                          | Taphozous melanopogon                       | NA    | Stelpaviricetes | Stellavirales  | Astroviridae    | Vertebrates |
| NC_043098 | Bat astrovirus Tm/Guangxi/LD7/1/2007        | LD71                          | Taphozous melanopogon                       | NA    | Stelpaviricetes | Stellavirales  | Astroviridae    | Vertebrates |
| NC_043100 | Bat astrovirus Tm/Guangxi/LD7/7/2007        | LD77                          | Taphozous melanopogon                       | NA    | Stelpaviricetes | Stellavirales  | Astroviridae    | Vertebrates |
| NC_010437 | Bat coronavirus 1A                          | AFCD62                        | NA                                          | NA    | Pisoniviricetes | Nidovirales    | Cornidovirineae | Vertebrates |
| NC_014470 | Bat coronavirus BM48-31/BGR/2008            | BtCoV/BM48-31/BGR/2008        | Rhinolophus blasii                          | NA    | Pisoniviricetes | Nidovirales    | Cornidovirineae | Vertebrates |
| NC_022103 | Bat coronavirus CDPHE15/USA/2006            | bat/USA/CDPHE15/2006          | Myotis lucifugus                            | NA    | Pisoniviricetes | Nidovirales    | Cornidovirineae | Vertebrates |
| NC_034440 | Bat coronavirus                             | PREDICT/PDF-2180              | Pipistrellus cf. hesperidus                 | NA    | Pisoniviricetes | Nidovirales    | Cornidovirineae | Vertebrates |
| NC_048212 | Bat coronavirus                             | CMR704-P12                    | Eidolon helvum                              | NA    | Pisoniviricetes | Nidovirales    | Cornidovirineae | Vertebrates |
| NC_033824 | Bat dicibavirus                             | NA                            | Eidolon helvum                              | NA    | Pisoniviricetes | Picornavirales | Marnaviridae    | Unknown     |
| NC_038316 | Bat hepatovirus BUO2BF86Colafr2010          | BUO2BF86Colafr2010            | Coleura afra                                | NA    | Pisoniviricetes | Picornavirales | Picornaviridae  | Vertebrates |
| NC_038313 | Bat hepatovirus SMG18520Minma v2014         | SMG18520Minma v2014           | Miniopterus cf. manavi                      | NA    | Pisoniviricetes | Picornavirales | Picornaviridae  | Vertebrates |
| NC_025217 | Bat Hp-beta coronavirus/Zhejiang2013        | Zhejiang2013                  | Hipposideros pratti                         | NA    | Pisoniviricetes | Nidovirales    | Cornidovirineae | Vertebrates |

|           |                                         |                                |                                                      |       |                 |                |                 |               |
|-----------|-----------------------------------------|--------------------------------|------------------------------------------------------|-------|-----------------|----------------|-----------------|---------------|
| NC_033823 | Bat iflavivirus                         | NA                             | Eidolon helvum                                       | NA    | Pisoniviricetes | Picornavirales | Iflaviridae     | Unknown       |
| NC_015940 | Bat picornavirus 1                      | NC16A                          | Miniopterus pusillus                                 | NA    | Pisoniviricetes | Picornavirales | Picornaviridae  | Unknown       |
| NC_015941 | Bat picornavirus 2                      | MH9F                           | Miniopterus magnater                                 | NA    | Pisoniviricetes | Picornavirales | Picornaviridae  | Unknown       |
| NC_015934 | Bat picornavirus 3                      | TLC5F                          | Rhinolophus sinicus                                  | NA    | Pisoniviricetes | Picornavirales | Picornaviridae  | Unknown       |
| NC_043071 | Bat picornavirus                        | BtMr-PicoV/JX2010              | Myotis ricketti                                      | NA    | Pisoniviricetes | Picornavirales | Picornaviridae  | Vertebrates   |
| NC_043072 | Bat picornavirus BatPV/V1/13 Hun        | BatPV/V1/13/Hun                | Miniopterus schreibersii                             | NA    | Pisoniviricetes | Picornavirales | Picornaviridae  | Vertebrates   |
| NC_033820 | Bat sapelovirus                         | NA                             | Eidolon helvum                                       | NA    | Pisoniviricetes | Picornavirales | Picornaviridae  | Vertebrates   |
| NC_033776 | Bat sapovirus                           | Bat-SaV/Limbe65/CA M/2014      | Eidolon helvum (Straw-coloured fruit bat)            | NA    | Pisoniviricetes | Picornavirales | Caliciviridae   | Vertebrates   |
| NC_017936 | Bat sapovirus TLC58/HK                  | TLC58/HK                       | bat                                                  | NA    | Pisoniviricetes | Picornavirales | Caliciviridae   | Vertebrates   |
| NC_004047 | Bean common mosaic necrosis virus       | Michigan                       | Phaseolus vulgaris                                   | NA    | Stelpaviricetes | Patatavirales  | Potyviridae     | Plants        |
| NC_003397 | Bean common mosaic virus                | R                              | cowpea                                               | NA    | Stelpaviricetes | Patatavirales  | Potyviridae     | Plants        |
| NC_003496 | Bean pod mottle virus                   | KY G-7                         | NA                                                   | RNA 1 | Pisoniviricetes | Picornavirales | Secoviridae     | Plants        |
| NC_003495 | Bean pod mottle virus                   | KY G-7                         | NA                                                   | RNA 2 | Pisoniviricetes | Picornavirales | Secoviridae     | Plants        |
| NC_028139 | Bean rugose mosaic virus                | Parana                         | Glycine max (soybean)                                | RNA 1 | Pisoniviricetes | Picornavirales | Secoviridae     | Plants        |
| NC_028146 | Bean rugose mosaic virus                | Parana                         | Glycine max (soybean)                                | RNA 2 | Pisoniviricetes | Picornavirales | Secoviridae     | Plants        |
| NC_003492 | Bean yellow mosaic virus                | MB4                            | NA                                                   | NA    | Stelpaviricetes | Patatavirales  | Potyviridae     | Plants        |
| NC_002766 | Beet chlorosis virus                    | BChV-2a                        | NA                                                   | NA    | Pisoniviricetes | Sobelivirales  | Solemoviridae   | Plants        |
| NC_003491 | Beet mild yellowing virus               | 2ITB                           | NA                                                   | NA    | Pisoniviricetes | Sobelivirales  | Solemoviridae   | Plants        |
| NC_005304 | Beet mosaic virus                       | BtMV-Wa                        | Beta vulgaris L.; red beet                           | NA    | Stelpaviricetes | Patatavirales  | Potyviridae     | Plants        |
| NC_003693 | Beet ringspot virus                     | S                              | NA                                                   | RNA 1 | Pisoniviricetes | Picornavirales | Secoviridae     | Plants        |
| NC_003694 | Beet ringspot virus                     | S                              | NA                                                   | RNA 2 | Pisoniviricetes | Picornavirales | Secoviridae     | Plants        |
| NC_004756 | Beet western yellows virus              | USA                            | NA                                                   | NA    | Pisoniviricetes | Sobelivirales  | Solemoviridae   | Plants        |
| NC_055601 | Begonia flower breaking virus           | YN-Tiger                       | Begonia bowerae cv. Tiger                            | NA    | Stelpaviricetes | Patatavirales  | Potyviridae     | Plants        |
| NC_032490 | Beihai hermit crab virus 4              | BHJJX25971                     | hermit crab                                          | NA    | Pisoniviricetes | Nidovirales    | Ronidovirineae  | Invertebrates |
| NC_032496 | Beihai Nido-like virus 1                | BZL87871                       | Turritella sea snails                                | NA    | Pisoniviricetes | Nidovirales    | Mesnidovirineae | Invertebrates |
| NC_032492 | Beihai Nido-like virus 2                | BHXun32263                     | Charybdis crab                                       | NA    | Pisoniviricetes | Nidovirales    | Ronidovirineae  | Invertebrates |
| NC_027915 | Bellflower vein chlorosis virus         | CT1                            | Campanula takesimana                                 | NA    | Pisoniviricetes | Picornavirales | Secoviridae     | Plants        |
| NC_039002 | Bellflower veinal mottle virus          | SW                             | Campanula takesimana                                 | NA    | Stelpaviricetes | Patatavirales  | Potyviridae     | Plants        |
| NC_046956 | Bellinger River virus                   | J248                           | Myuchelys georgesi (Bellinger River snapping turtle) | NA    | Pisoniviricetes | Nidovirales    | Tornidovirineae | Vertebrates   |
| NC_010646 | Beluga whale coronavirus SW1            | SW1                            | Delphinapterus leucas (beluga whale)                 | NA    | Pisoniviricetes | Nidovirales    | Cornidovirineae | Vertebrates   |
| NC_043212 | Berne virus                             | isolate P138/72                | NA                                                   | RNA 1 | Pisoniviricetes | Nidovirales    | Tornidovirineae | Vertebrates   |
| NC_043211 | Berne virus                             | isolate P138/72                | NA                                                   | RNA 2 | Pisoniviricetes | Nidovirales    | Tornidovirineae | Vertebrates   |
| NC_038294 | Betacoronavirus England 1               | H123990006                     | Homo sapiens                                         | NA    | Pisoniviricetes | Nidovirales    | Cornidovirineae | Vertebrates   |
| NC_039207 | Betacoronavirus Erinaceus/VMC/D EU/2012 | ErinaceusCoV/2012-174/GER/2012 | Erinaceus europaeus                                  | NA    | Pisoniviricetes | Nidovirales    | Cornidovirineae | Vertebrates   |
| NC_026011 | Betacoronavirus HKU24                   | HKU24-R05005I                  | Rattus norvegicus (Norway rat)                       | NA    | Pisoniviricetes | Nidovirales    | Cornidovirineae | Vertebrates   |
| NC_023014 | Bidens mosaic virus                     | SP01                           | Bidens pilosa                                        | NA    | Stelpaviricetes | Patatavirales  | Potyviridae     | Plants        |
| NC_014325 | Bidens mottle virus                     | SF-1                           | Helianthus annuus                                    | NA    | Stelpaviricetes | Patatavirales  | Potyviridae     | Plants        |
| NC_035184 | Big Sioux River virus                   | Kenya P9                       | Aphis fabae                                          | NA    | Pisoniviricetes | Picornavirales | Dicistroviridae | Invertebrates |
| NC_032840 | Biomphalaria virus 3                    | NA                             | Biomphalaria glabrata                                | NA    | Pisoniviricetes | Picornavirales |                 | Invertebrates |
| NC_032112 | Bivalve RNA virus G1                    | G1                             | NA                                                   | NA    | Pisoniviricetes | Picornavirales | Dicistroviridae | Invertebrates |
| NC_032114 | Bivalve RNA virus G3                    | G3                             | NA                                                   | NA    | Pisoniviricetes | Picornavirales |                 | Invertebrates |
| NC_032115 | Bivalve RNA virus G5                    | G5                             | NA                                                   | NA    | Pisoniviricetes | Picornavirales | Dicistroviridae | Invertebrates |
| NC_003784 | Black queen cell virus                  | South African                  | Apis mellifera                                       | NA    | Pisoniviricetes | Picornavirales | Dicistroviridae | Invertebrates |
| NC_008182 | Black raspberry necrosis virus          | BRDaV-1                        | NA                                                   | RNA 1 | Pisoniviricetes | Picornavirales | Secoviridae     | Plants        |
| NC_008183 | Black raspberry necrosis virus          | BRDaV-1                        | NA                                                   | RNA 2 | Pisoniviricetes | Picornavirales | Secoviridae     | Plants        |
| NC_008558 | Blackberry virus Y                      | 3                              | blackberry                                           | NA    | Stelpaviricetes | Patatavirales  | Potyviridae     | Plants        |
| NC_003502 | Blackcurrant reversion virus            | NA                             | Ribes nigrum L.                                      | RNA 2 | Pisoniviricetes | Picornavirales | Secoviridae     | Plants        |

|           |                                      |                    |                                         |       |                 |                |                 |               |
|-----------|--------------------------------------|--------------------|-----------------------------------------|-------|-----------------|----------------|-----------------|---------------|
| NC_003509 | Blackcurrant reversion virus         | NA                 | NA                                      | RNA 1 | Pisoniviricetes | Picornavirales | Secoviridae     | Plants        |
| NC_019415 | Blue squill virus A                  | SW3                | NA                                      | NA    | Stelpaviricetes | Patatavirales  | Potyviridae     | Plants        |
| NC_038764 | Blueberry latent spherical virus     | NA                 | NA                                      | 1     | Pisoniviricetes | Picornavirales | Secoviridae     | Plants        |
| NC_038763 | Blueberry latent spherical virus     | NA                 | NA                                      | 2     | Pisoniviricetes | Picornavirales | Secoviridae     | Plants        |
| NC_029578 | Blueberry shoestring virus           | BSSV               | Vaccinium sp.                           | NA    | Pisoniviricetes | Sobelivirales  | Solemoviridae   | Plants        |
| NC_018506 | limnipivirus A1                      | 04-032             | Lepomis macrochirus                     | NA    | Pisoniviricetes | Picornavirales | Picornaviridae  | Vertebrates   |
| NC_027713 | Bombyx mori iflavivirus              | BMI1               | Bombyx mori strain Kinsyu-Syowa         | NA    | Pisoniviricetes | Picornavirales | Iflaviridae     | Invertebrates |
| NC_038305 | cardiovirus C1                       | BCV-1              | Rattus norvegicus                       | NA    | Pisoniviricetes | Picornavirales | Picornaviridae  | Vertebrates   |
| NC_055538 | Botrylloides leachii nidovirus       | SRR2729873         | Botrylloides leachii                    | NA    | Pisoniviricetes | Nidovirales    | Mesnidovirineae | Invertebrates |
| NC_043096 | Bottlenose dolphin astrovirus 1      | Bd1                | Tursiops truncatus (Bottlenose dolphin) | NA    | Stelpaviricetes | Stellavirales  | Astroviridae    | Vertebrates   |
| NC_023632 | Bovine astrovirus B170/HK            | B170/HK            | cattle                                  | NA    | Stelpaviricetes | Stellavirales  | Astroviridae    | Vertebrates   |
| NC_023631 | Bovine astrovirus B18/HK             | B18/HK             | cattle                                  | NA    | Stelpaviricetes | Stellavirales  | Astroviridae    | Vertebrates   |
| NC_023630 | Bovine astrovirus B76-2/HK           | B76-2/HK           | cattle                                  | NA    | Stelpaviricetes | Stellavirales  | Astroviridae    | Vertebrates   |
| NC_023629 | Bovine astrovirus B76/HK             | B76/HK             | cattle                                  | NA    | Stelpaviricetes | Stellavirales  | Astroviridae    | Vertebrates   |
| NC_024498 | Bovine astrovirus CH13               | CH13               | cattle                                  | NA    | Stelpaviricetes | Stellavirales  | Astroviridae    | Vertebrates   |
| NC_024297 | Bovine astrovirus                    | BAstV-GX7/CHN/2014 | cattle                                  | NA    | Stelpaviricetes | Stellavirales  | Astroviridae    | Vertebrates   |
| NC_030793 | Bovine calicivirus strain Kirklareli | Kirklareli         | bovine                                  | NA    | Pisoniviricetes | Picornavirales | Caliciviridae   | Vertebrates   |
| NC_003045 | Bovine coronavirus                   | BCoV-ENT           | NA                                      | NA    | Pisoniviricetes | Nidovirales    | Cornidovirineae | Vertebrates   |
| NC_001859 | Enterovirus E                        | VG-5-27            | NA                                      | NA    | Pisoniviricetes | Picornavirales | Picornaviridae  | Vertebrates   |
| NC_018668 | hunnivirus A1                        | BHUV1/2008/HUN     | Bos taurus (cattle)                     | NA    | Pisoniviricetes | Picornavirales | Picornaviridae  | Vertebrates   |
| NC_027199 | Bovine nidovirus TCH5                | TCH5               | Bos taurus                              | NA    | Pisoniviricetes | Nidovirales    | Tornidovirineae | Vertebrates   |
| NC_026249 | Bovine picornavirus                  | TCH6               | Bos taurus                              | NA    | Pisoniviricetes | Picornavirales | Picornaviridae  | Vertebrates   |
| NC_038303 | Bovine rhinitis A virus              | Sd-1               | bovine                                  | NA    | Pisoniviricetes | Picornavirales | Picornaviridae  | Vertebrates   |
| NC_010354 | bovine rhinitis B virus 1            | EC11               | bovine                                  | NA    | Pisoniviricetes | Picornavirales | Picornaviridae  | Vertebrates   |
| NC_034245 | Bovine rhinovirus 1                  | SD-1               | calf                                    | NA    | Pisoniviricetes | Picornavirales | Picornaviridae  | Vertebrates   |
| NC_040586 | Brassica napus RNA virus 1           | SP25               | Brassica napus                          | NA    | Pisoniviricetes | Picornavirales | Secoviridae     | Plants        |
| NC_016038 | Brassica yellows virus               | BrYV-ABJ           | Brassica napus var. napobrassica        | NA    | Pisoniviricetes | Sobelivirales  | Solemoviridae   | Plants        |
| NC_007447 | Breda virus                          | Breda 1            | NA                                      | NA    | Pisoniviricetes | Nidovirales    | Tornidovirineae | Vertebrates   |
| NC_009530 | Brevicoryne brassicae virus - UK     | NA                 | Brevicoryne brassicae                   | NA    | Pisoniviricetes | Picornavirales | Iflaviridae     | Invertebrates |
| NC_022004 | Broad bean true mosaic virus         | EV-11              | NA                                      | RNA 1 | Pisoniviricetes | Picornavirales | Secoviridae     | Plants        |
| NC_022006 | Broad bean true mosaic virus         | EV-11              | NA                                      | RNA 2 | Pisoniviricetes | Picornavirales | Secoviridae     | Plants        |
| NC_005289 | Broad bean wilt virus 1              | ATCC PV132         | NA                                      | RNA 1 | Pisoniviricetes | Picornavirales | Secoviridae     | Plants        |
| NC_005290 | Broad bean wilt virus 1              | ATCC PV132         | NA                                      | RNA 2 | Pisoniviricetes | Picornavirales | Secoviridae     | Plants        |
| NC_003003 | Broad bean wilt virus 2              | ME                 | NA                                      | RNA 1 | Pisoniviricetes | Picornavirales | Secoviridae     | Plants        |
| NC_003004 | Broad bean wilt virus 2              | ME                 | NA                                      | RNA 2 | Pisoniviricetes | Picornavirales | Secoviridae     | Plants        |
| NC_038560 | Broad-leaved dock virus A            | ab032 Auckland     | Rumex obtusifolius                      | NA    | Stelpaviricetes | Patatavirales  | Potyviridae     | Plants        |
| NC_003501 | Brome streak mosaic virus            | NA                 | NA                                      | NA    | Stelpaviricetes | Patatavirales  | Potyviridae     | Plants        |
| NC_020105 | Brugmansia mosaic virus              | SK                 | Brugmansia suaveolens                   | NA    | Stelpaviricetes | Patatavirales  | Potyviridae     | Plants        |
| NC_014536 | Brugmansia suaveolens mottle virus   | Bs-Campinas        | NA                                      | NA    | Stelpaviricetes | Patatavirales  | Potyviridae     | Plants        |
| NC_028811 | BtMr-AlphaCoV/SAX2011                | BtMr-SAX2011       | Myotis ricketti                         | NA    | Pisoniviricetes | Nidovirales    | Cornidovirineae | Vertebrates   |
| NC_028833 | BtNv-AlphaCoV/SC2013                 | BtNv-SC2013        | Nyctalus velutinus                      | NA    | Pisoniviricetes | Nidovirales    | Cornidovirineae | Vertebrates   |
| NC_028814 | BtRf-AlphaCoV/HuB2013                | BtRf-HuB2013       | Rhinolophus ferrumequinum               | NA    | Pisoniviricetes | Nidovirales    | Cornidovirineae | Vertebrates   |
| NC_028824 | BtRf-AlphaCoV/YN2012                 | BtRf-YN2012        | Rhinolophus ferrumequinum               | NA    | Pisoniviricetes | Nidovirales    | Cornidovirineae | Vertebrates   |
| NC_011547 | Bulbul coronavirus HKU11-934         | NA                 | red-whiskered bulbul                    | NA    | Pisoniviricetes | Nidovirales    | Cornidovirineae | Vertebrates   |



|           |                                                |                          |                                                     |       |                 |                |                 |               |
|-----------|------------------------------------------------|--------------------------|-----------------------------------------------------|-------|-----------------|----------------|-----------------|---------------|
| NC_018572 | Caladenia virus A                              | KP1                      | Caladenia latifolia                                 | NA    | Stelpaviricetes | Patatavirales  | Potyviridae     | Plants        |
| NC_006875 | Calicivirus isolate TCG                        | TCG 14                   | bovine                                              | NA    | Pisoniviricetes | Picornavirales | Caliciviridae   | Vertebrates   |
| NC_012699 | Calicivirus pig/AB90/CAN                       | AB90                     | Sus scrofa (swine)                                  | NA    | Pisoniviricetes | Picornavirales | Caliciviridae   | Vertebrates   |
| NC_034975 | California sea lion astrovirus 2               | CSL2                     | Zalophus californianus (California sea lion)        | NA    | Stelpaviricetes | Stellavirales  | Astroviridae    | Vertebrates   |
| NC_030794 | Callistephus mottle virus                      | DJ                       | Callistephus chinensis camel                        | NA    | Stelpaviricetes | Patatavirales  | Potyviridae     | Plants        |
| NC_028752 | Camel alphacoronavirus                         | camel/Riyadh/Ry141/2015  | camel                                               | NA    | Pisoniviricetes | Nidovirales    | Cornidovirineae | Vertebrates   |
| NC_046965 | Canada goose coronavirus                       | Cambridge_Bay_2017       | Branta canadensis                                   | NA    | Pisoniviricetes | Nidovirales    | Cornidovirineae | Vertebrates   |
| NC_026814 | Canine astrovirus                              | Gillingham/2012/UK       | NA                                                  | NA    | Stelpaviricetes | Stellavirales  | Astroviridae    | Vertebrates   |
| NC_004542 | Canine vesivirus                               | NA                       | NA                                                  | NA    | Pisoniviricetes | Picornavirales | Caliciviridae   | Vertebrates   |
| NC_034971 | Canine kobuvirus                               | SMCD-59                  | dog                                                 | NA    | Pisoniviricetes | Picornavirales | Picornaviridae  | Vertebrates   |
| NC_016964 | Canine picornavirus                            | 325                      | Canis familiaris                                    | NA    | Pisoniviricetes | Picornavirales | Picornaviridae  | Vertebrates   |
| NC_013261 | Canna yellow streak virus                      | NA                       | Canna                                               | NA    | Stelpaviricetes | Patatavirales  | Potyviridae     | Plants        |
| NC_023422 | Caprine kobuvirus                              | 12Q108                   | black goat                                          | NA    | Pisoniviricetes | Picornavirales | Picornaviridae  | Vertebrates   |
| NC_039088 | Cardamom mosaic virus                          | KS                       | Elettaria cardamomum                                | NA    | Stelpaviricetes | Patatavirales  | Potyviridae     | Plants        |
| NC_023162 | Carp picornavirus 1                            | F37/06                   | Cyprinus carpio                                     | NA    | Pisoniviricetes | Picornavirales | Picornaviridae  | Vertebrates   |
| NC_038320 | Carrot necrotic dieback virus                  | Anthriscus               | Daucus carota                                       | NA    | Pisoniviricetes | Picornavirales | Secoviridae     | Plants        |
| NC_006265 | Carrot red leaf virus                          | UK-1                     | NA                                                  | NA    | Pisoniviricetes | Sobelivirales  | Solemoviridae   | Plants        |
| NC_025254 | Carrot thin leaf virus                         | CTLV-Cs                  | Coriandrum sativum                                  | NA    | Stelpaviricetes | Patatavirales  | Potyviridae     | Plants        |
| NC_025479 | Carrot torradovirus 1                          | CTV-1_RNA1_H6            | Daucus carota                                       | RNA 1 | Pisoniviricetes | Picornavirales | Secoviridae     | Plants        |
| NC_025480 | Carrot torradovirus 1                          | CTV-1_RNA2_H6            | Daucus carota                                       | RNA 2 | Pisoniviricetes | Picornavirales | Secoviridae     | Plants        |
| NC_012698 | Cassava brown streak virus                     | KOR6                     | cassava                                             | NA    | Stelpaviricetes | Patatavirales  | Potyviridae     | Plants        |
| NC_023986 | Casuarina virus                                | 71                       | Coquillettia xanthogaster                           | NA    | Pisoniviricetes | Nidovirales    | Mesnidovirineae | Invertebrates |
| NC_027210 | Catharanthus mosaic virus                      | Mandevilla-US            | Mandevilla sp. 'Sunmandeho' Sun Parasol Giant White | NA    | Stelpaviricetes | Patatavirales  | Potyviridae     | Plants        |
| NC_015668 | Cavally virus                                  | C79                      | Aedes harrisoni                                     | NA    | Pisoniviricetes | Nidovirales    | Mesnidovirineae | Invertebrates |
| NC_055507 | Celery latent virus                            | Ag097                    | Apium graveolens                                    | NA    | Stelpaviricetes | Patatavirales  | Potyviridae     | Plants        |
| NC_015393 | Celery mosaic virus                            | California               | Secalinum Group Apium graveolens L. (celery)        | NA    | Stelpaviricetes | Patatavirales  | Potyviridae     | Plants        |
| NC_031687 | Centovirus AC                                  | AC                       | mosquito                                            | NA    | Pisoniviricetes | Picornavirales | Dicistroviridae | Invertebrates |
| NC_002198 | Cereal yellow dwarf virus RPS                  | NA                       | NA                                                  | NA    | Pisoniviricetes | Sobelivirales  | Solemoviridae   | Plants        |
| NC_004751 | Cereal yellow dwarf virus RPV                  | NY                       | NA                                                  | NA    | Pisoniviricetes | Sobelivirales  | Solemoviridae   | Plants        |
| NC_012212 | Chaetoceros socialis forma radians RNA virus 1 | NA                       | NA                                                  | 1     | Pisoniviricetes | Picornavirales | Marnaviridae    | Chromista     |
| NC_055125 | Chaetoceros species RNA virus 02               | Csp02RNAV01              | Chaetoceros sp.                                     | NA    | Pisoniviricetes | Picornavirales | Marnaviridae    | Chromista     |
| NC_038321 | Chaetoceros tenuissimus RNA virus 01           | CtenRNAV01               | Chaetoceros tenuissimus Meunier                     | NA    | Pisoniviricetes | Picornavirales | Marnaviridae    | Chromista     |
| NC_025889 | Chaetoceros tenuissimus RNA virus type II      | SS10-16V                 | Chaetoceros tenuissimus strain 2-10                 | NA    | Pisoniviricetes | Picornavirales | Marnaviridae    | Chromista     |
| NC_036389 | Chequa iflavivirus                             | A14-49.4                 | Cherax quadricarinatus                              | NA    | Pisoniviricetes | Picornavirales | Iflaviridae     | Invertebrates |
| NC_015414 | Cherry leaf roll virus                         | E395                     | Rheum sp.                                           | RNA 1 | Pisoniviricetes | Picornavirales | Secoviridae     | Plants        |
| NC_015415 | Cherry leaf roll virus                         | E395                     | Rheum sp.                                           | RNA 2 | Pisoniviricetes | Picornavirales | Secoviridae     | Plants        |
| NC_006272 | Cherry rasp leaf virus                         | potato isolate           | NA                                                  | RNA 2 | Pisoniviricetes | Picornavirales | Secoviridae     | Plants        |
| NC_006271 | Cherry rasp leaf virus                         | potato                   | NA                                                  | NA    | Pisoniviricetes | Picornavirales | Secoviridae     | Plants        |
| NC_003790 | Chicken astrovirus                             | G-4260                   | NA                                                  | NA    | Stelpaviricetes | Stellavirales  | Astroviridae    | Vertebrates   |
| NC_033081 | Chicken calicivirus                            | RS/BR/2015               | Gallus gallus                                       | NA    | Pisoniviricetes | Picornavirales | Caliciviridae   | Vertebrates   |
| NC_039235 | Chicken megrovirus                             | chicken/B21-CHV/2012/HUN | Gallus gallus domesticus (domestic chicken)         | NA    | Pisoniviricetes | Picornavirales | Picornaviridae  | Vertebrates   |
| NC_025432 | Chicken orivirus 1                             | chicken/Pf-CHK1/2013/HUN | Gallus gallus domesticus (domestic chicken)         | NA    | Pisoniviricetes | Picornavirales | Picornaviridae  | Vertebrates   |
| NC_024765 | Chicken picornavirus 1                         | 55C                      | Gallus gallus                                       | NA    | Pisoniviricetes | Picornavirales | Picornaviridae  | Vertebrates   |

|           |                                                     |               |                                    |       |                 |                |                 |               |
|-----------|-----------------------------------------------------|---------------|------------------------------------|-------|-----------------|----------------|-----------------|---------------|
| NC_024766 | Chicken<br>picornavirus 2                           | 44C           | Gallus gallus                      | NA    | Pisoniviricetes | Picornavirales | Picornaviridae  | Vertebrates   |
| NC_024767 | Chicken<br>picornavirus 3                           | 45C           | Gallus gallus                      | NA    | Pisoniviricetes | Picornavirales | Picornaviridae  | Vertebrates   |
| NC_024768 | Chicken<br>picornavirus 4                           | 5C            | Gallus gallus                      | NA    | Pisoniviricetes | Picornavirales | Picornaviridae  | Vertebrates   |
| NC_008249 | Chickpea<br>chlorotic stunt<br>virus                | Et-fb-am1     | fab a bean                         | NA    | Pisoniviricetes | Sobelivirales  | Solemoviridae   | Plants        |
| NC_016044 | Chilli ringspot<br>virus                            | ChiRSV-HN/14  | chilli                             | NA    | Stelpaviricetes | Patatavirales  | Potyviridae     | Plants        |
| NC_005778 | Chilli veinal<br>mottle virus                       | NA            | Capsicum<br>annuum                 | NA    | Stelpaviricetes | Patatavirales  | Potyviridae     | Plants        |
| NC_046961 | Chinese broad-<br>headed pond<br>turtle arterivirus | WHWGC150683   | Mauremys<br>megaloccephala         | NA    | Pisoniviricetes | Nidovirales    | Arnidovirineae  | Vertebrates   |
| NC_018455 | Chinese yam<br>necrotic mosaic<br>virus             | PES3          | Dioscorea<br>opposita              | NA    | Stelpaviricetes | Patatavirales  | Potyviridae     | Plants        |
| NC_026812 | Chinook salmon<br>bafinivirus                       | NIDO          | Oncorhynchus<br>tshawytscha        | NA    | Pisoniviricetes | Nidovirales    | Tornidovirineae | Vertebrates   |
| NC_016443 | Chocolate lily<br>virus A                           | KP2           | Dichopogon<br>strictus             | RNA 1 | Pisoniviricetes | Picornavirales | Secoviridae     | Plants        |
| NC_016444 | Chocolate lily<br>virus A                           | KP2           | Dichopogon<br>strictus             | RNA 2 | Pisoniviricetes | Picornavirales | Secoviridae     | Plants        |
| NC_021564 | Citrus vein<br>enation virus                        | VE-1          | Citrus sp.                         | NA    | Pisoniviricetes | Sobelivirales  | Solemoviridae   | Plants        |
| NC_003536 | Clover yellow<br>vein virus                         | No.30         | NA                                 | NA    | Stelpaviricetes | Patatavirales  | Potyviridae     | Plants        |
| NC_030840 | Coccinia mottle<br>virus                            | Su12-25       | Coccinia grandis                   | NA    | Stelpaviricetes | Patatavirales  | Potyviridae     | Plants        |
| NC_002618 | Cocksfoot mottle<br>virus                           | NA            | NA                                 | NA    | Pisoniviricetes | Sobelivirales  | Solemoviridae   | Plants        |
| NC_003742 | Cocksfoot streak<br>virus                           | NA            | NA                                 | NA    | Stelpaviricetes | Patatavirales  | Potyviridae     | Plants        |
| NC_043077 | Cocoa necrosis<br>virus                             | ATCC PV-283   | NA                                 | NA    | Pisoniviricetes | Picornavirales | Secoviridae     | Plants        |
| NC_020072 | Colombian datura<br>virus                           | NA            | Nicotiana<br>tabacum               | NA    | Stelpaviricetes | Patatavirales  | Potyviridae     | Plants        |
| NC_034972 | Coronavirus<br>AcCoV-JC34                           | AcCoV-JC34    | Apodemus<br>chevrieri              | NA    | Pisoniviricetes | Nidovirales    | Cornidovirineae | Vertebrates   |
| NC_012800 | Cosavirus A                                         | 553           | Homo sapiens                       | NA    | Pisoniviricetes | Picornavirales | Picornaviridae  | Vertebrates   |
| NC_025961 | Cosavirus JMY-<br>2014                              | Cosa-CHN      | Homo sapiens                       | NA    | Pisoniviricetes | Picornavirales | Picornaviridae  | Vertebrates   |
| NC_055568 | Costus stripe<br>mosaic virus                       | BR1           | Costus spiralis<br>(spiral ginger) | NA    | Stelpaviricetes | Patatavirales  | Potyviridae     | Plants        |
| NC_014545 | Cotton leafroll<br>dwarf virus                      | ARG           | Gossypium<br>hirsutum (cotton)     | NA    | Pisoniviricetes | Sobelivirales  | Solemoviridae   | Plants        |
| NC_000940 | Cowden I virus                                      | Cowden        | NA                                 | NA    | Pisoniviricetes | Picornavirales | Caliciviridae   | Vertebrates   |
| NC_004013 | Cowpea aphid-<br>borne mosaic<br>virus              | CABMV-Z       | NA                                 | NA    | Stelpaviricetes | Patatavirales  | Potyviridae     | Plants        |
| NC_003550 | Cowpea mosaic<br>virus                              | NA            | NA                                 | NA    | Pisoniviricetes | Picornavirales | Secoviridae     | Plants        |
| NC_003549 | Cowpea mosaic<br>virus                              | NA            | NA                                 | RNA 1 | Pisoniviricetes | Picornavirales | Secoviridae     | Plants        |
| NC_034246 | Cowpea<br>polerovirus 1                             | BE167         | Vigna unguiculata                  | NA    | Pisoniviricetes | Sobelivirales  | Solemoviridae   | Plants        |
| NC_034247 | Cowpea<br>polerovirus 2                             | BE179         | Vigna unguiculata                  | NA    | Pisoniviricetes | Sobelivirales  | Solemoviridae   | Plants        |
| NC_003545 | Cowpea severe<br>mosaic virus                       | NA            | NA                                 | RNA 1 | Pisoniviricetes | Picornavirales | Secoviridae     | Plants        |
| NC_003544 | Cowpea severe<br>mosaic virus                       | NA            | NA                                 | RNA 2 | Pisoniviricetes | Picornavirales | Secoviridae     | Plants        |
| NC_038307 | Coxsackievirus B3                                   | NA            | NA                                 | NA    | Pisoniviricetes | Picornavirales | Picornaviridae  | Vertebrates   |
| NC_003924 | Cricket paralysis<br>virus                          | NA            | NA                                 | NA    | Pisoniviricetes | Picornavirales | Dicistroviridae | Invertebrates |
| NC_025219 | Cripavirus NB-<br>1/2011/HUN                        | NB-1/2011/HUN | Pipistrellus<br>pipistrellus (bat) | NA    | Pisoniviricetes | Picornavirales | Dicistroviridae | Invertebrates |
| NC_025474 | Crohivirus A                                        | ZM54          | Crocidura hirta                    | NA    | Pisoniviricetes | Picornavirales | Picornaviridae  | Vertebrates   |
| NC_033819 | Crohivirus B                                        | NA            | Eidolon helvum                     | NA    | Pisoniviricetes | Picornavirales | Picornaviridae  | Vertebrates   |
| NC_006941 | Cucumber vein<br>yellowing virus                    | ALM32         | NA                                 | NA    | Stelpaviricetes | Patatavirales  | Potyviridae     | Plants        |
| NC_003688 | Cucurbit aphid-<br>borne yellows<br>virus           | N             | NA                                 | NA    | Pisoniviricetes | Sobelivirales  | Solemoviridae   | Plants        |
| NC_038760 | Cucurbit mild<br>mosaic virus                       | Beijing       | cucurbit                           | RNA1  | Pisoniviricetes | Picornavirales | Secoviridae     | Plants        |
| NC_038759 | Cucurbit mild<br>mosaic virus                       | Beijing       | curbit                             | RNA2  | Pisoniviricetes | Picornavirales | Secoviridae     | Plants        |
| NC_035134 | Cucurbit vein<br>banding virus                      | 3.1           | Cucurbita<br>maxima<br>(Zapallito) | NA    | Stelpaviricetes | Patatavirales  | Potyviridae     | Plants        |
| NC_040647 | Culex<br>Bastrovirus-like<br>virus                  | CAVL/Fresno   | Culex sp.<br>(mosquito)            | NA    | Stelpaviricetes | Stellavirales  | Astroviridae    | Unknown       |
| NC_040646 | Culex Iflavi-like<br>virus 1                        | CIVL1/Sutter  | Culex sp.<br>(mosquito)            | NA    | Pisoniviricetes | Picornavirales | Iflaviridae     | Invertebrates |
| NC_040574 | Culex Iflavi-like<br>virus 4                        | CIVL/Kern     | Culex sp.<br>(mosquito)            | NA    | Pisoniviricetes | Picornavirales | Iflaviridae     | Invertebrates |
| NC_040832 | Culex Iflavi-like<br>virus 4                        | CIVL4-Sonoma  | Culex sp.<br>(mosquito)            | NA    | Pisoniviricetes | Picornavirales | Iflaviridae     | Invertebrates |
| NC_040716 | Culex Iflavi-like<br>virus 4                        | CIVL4/Fresno  | Culex sp.<br>(mosquito)            | NA    | Pisoniviricetes | Picornavirales | Iflaviridae     | Invertebrates |

|           |                                        |                                 |                                        |       |                 |                |                 |               |
|-----------|----------------------------------------|---------------------------------|----------------------------------------|-------|-----------------|----------------|-----------------|---------------|
| NC_029038 | Currant latent virus                   | NA                              | red currant cv. Holandsky cerveny      | RNA 1 | Pisoniviricetes | Picornavirales | Secoviridae     | Plants        |
| NC_029036 | Currant latent virus                   | NA                              | red currant cv. Holandsky cerveny      | RNA 2 | Pisoniviricetes | Picornavirales | Secoviridae     | Plants        |
| NC_003791 | Cycas necrotic stunt virus             | NA                              | NA                                     | RNA 1 | Pisoniviricetes | Picornavirales | Secoviridae     | Plants        |
| NC_003792 | Cycas necrotic stunt virus             | NA                              | NA                                     | RNA 2 | Pisoniviricetes | Picornavirales | Secoviridae     | Plants        |
| NC_027123 | Cymbidium chlorotic mosaic virus       | Cym92-20                        | Cymbidium goeringii (spring orchid)    | NA    | Pisoniviricetes | Sobelivirales  | Solemoviridae   | Plants        |
| NC_038297 | Dak Nong virus                         | HL30                            | Culex tritaeniorhynchus                | NA    | Pisoniviricetes | Nidovirales    | Mesnidovirineae | Invertebrates |
| NC_043078 | Dandelion yellow mosaic virus          | DSM2                            | NA                                     | NA    | Pisoniviricetes | Picornavirales | Secoviridae     | Plants        |
| NC_008028 | Daphne mosaic virus                    | NA                              | Daphne mezereum                        | NA    | Stelpaviricetes | Patatavirales  | Potyviridae     | Plants        |
| NC_038984 | Daphne virus Y                         | SK                              | Daphne odora Thunb.                    | NA    | Stelpaviricetes | Patatavirales  | Potyviridae     | Plants        |
| NC_003537 | Dasheen mosaic virus                   | M13                             | Zantedeschia aethiopica                | NA    | Stelpaviricetes | Patatavirales  | Potyviridae     | Plants        |
| NC_026509 | DeBrazza's monkey arterivirus          | PREDICT-06530                   | Cercopithecus neglectus                | NA    | Pisoniviricetes | Nidovirales    | Arnidovirineae  | Vertebrates   |
| NC_004830 | Deformed wing virus                    | NA                              | Apis mellifera                         | NA    | Pisoniviricetes | Picornavirales | Iflaviridae     | Invertebrates |
| NC_029131 | Delisea pulchra RNA virus              | Delisea                         | Delisea pulchra                        | NA    | Pisoniviricetes | Picornavirales |                 | Chromista     |
| NC_055520 | Dendrobium chlorotic mosaic virus      | 98-De-31                        | Dendrobium smilliae                    | NA    | Stelpaviricetes | Patatavirales  | Potyviridae     | Plants        |
| NC_034384 | Diamondback moth iflavirus             | Guangzhou                       | Plutella xylostella                    | NA    | Pisoniviricetes | Picornavirales | Iflaviridae     | Invertebrates |
| NC_036586 | Dianke virus                           | SEN235030                       | Mastomys natalensis                    | NA    | Pisoniviricetes | Nidovirales    | Mesnidovirineae | Invertebrates |
| NC_025835 | Dinocampus coccinellae paralysis virus | Quebec2013                      | Dinocampus coccinellae (Schrank, 1802) | NA    | Pisoniviricetes | Picornavirales | Iflaviridae     | Invertebrates |
| NC_055506 | Dioscorea mosaic virus                 | DMV-FL                          | Dioscorea bulbifera                    | NA    | Stelpaviricetes | Patatavirales  | Potyviridae     | Plants        |
| NC_031766 | Dioscorea mosaic associated virus      | goiana                          | Dioscorea rotundata                    | RA11  | Pisoniviricetes | Picornavirales | Secoviridae     | Plants        |
| NC_031763 | Dioscorea mosaic associated virus      | goiana                          | Dioscorea rotundata                    | RA22  | Pisoniviricetes | Picornavirales | Secoviridae     | Plants        |
| NC_021197 | Donkey orchid virus A                  | SW3.1                           | Diuris corymbosa                       | NA    | Stelpaviricetes | Patatavirales  | Potyviridae     | Plants        |
| NC_027711 | Dromedary astrovirus                   | DcAstV-274                      | Camelus dromedarius                    | NA    | Stelpaviricetes | Stellavirales  | Astroviridae    | Vertebrates   |
| NC_038310 | Dromedary camel enterovirus 19CC       | 19CC                            | dromedary                              | NA    | Pisoniviricetes | Picornavirales | Picornaviridae  | Vertebrates   |
| NC_001834 | Drosophila C virus                     | EB                              | NA                                     | NA    | Pisoniviricetes | Picornavirales | Dicistroviridae | Invertebrates |
| NC_012437 | Duck astrovirus C-NGB                  | C-NGB                           | duck                                   | NA    | Stelpaviricetes | Stellavirales  | Astroviridae    | Vertebrates   |
| NC_048214 | Duck coronavirus                       | DK/GD/27/2014                   | duck                                   | NA    | Pisoniviricetes | Nidovirales    | Cornidovirineae | Vertebrates   |
| NC_008250 | Duck hepatitis A virus 1               | R85952; ATCC VR-191             | NA                                     | NA    | Pisoniviricetes | Picornavirales | Picornaviridae  | Vertebrates   |
| NC_023985 | Duck aalivirus 1                       | GL/12                           | Pekin duck                             | NA    | Pisoniviricetes | Picornavirales | Picornaviridae  | Vertebrates   |
| NC_055483 | East Asian Passiflora distortion virus | PY-AK                           | Passiflora edulis                      | NA    | Stelpaviricetes | Patatavirales  | Potyviridae     | Plants        |
| NC_007728 | East Asian Passiflora virus            | AO                              | NA                                     | NA    | Stelpaviricetes | Patatavirales  | Potyviridae     | Plants        |
| NC_005092 | Ectropis obliqua picorna-like virus    | NA                              | Ectropis obliqua                       | NA    | Pisoniviricetes | Picornavirales | Iflaviridae     | Invertebrates |
| NC_022332 | Eel picornavirus 1                     | F15/05                          | Anguilla anguilla                      | NA    | Pisoniviricetes | Picornavirales | Picornaviridae  | Vertebrates   |
| NC_001479 | Encephalomyocarditis virus             | Ruckert                         | NA                                     | NA    | Pisoniviricetes | Picornavirales | Picornaviridae  | Vertebrates   |
| NC_034273 | Endive necrotic mosaic virus           | ENMV-FR                         | lettuce                                | NA    | Stelpaviricetes | Patatavirales  | Potyviridae     | Plants        |
| NC_030454 | enterovirus A114                       | V13-0285                        | Homo sapiens                           | NA    | Pisoniviricetes | Picornavirales | Picornaviridae  | Vertebrates   |
| NC_033695 | Enterovirus AN12                       | AN12                            | Bos taurus                             | NA    | Pisoniviricetes | Picornavirales | Picornaviridae  | Vertebrates   |
| NC_021220 | Enterovirus F                          | BEV-261; M2; RM2                | NA                                     | NA    | Pisoniviricetes | Picornavirales | Picornaviridae  | Vertebrates   |
| NC_034267 | Enterovirus goat/JL14                  | JL14                            | Capra hircus                           | NA    | Pisoniviricetes | Picornavirales | Picornaviridae  | Vertebrates   |
| NC_010415 | Enterovirus J                          | Simian enterovirus SV6          | NA                                     | NA    | Pisoniviricetes | Picornavirales | Picornaviridae  | Vertebrates   |
| NC_013695 | Enterovirus J                          | Simian picornavirus strain N203 | NA                                     | NA    | Pisoniviricetes | Picornavirales | Picornaviridae  | Vertebrates   |
| NC_029905 | Enterovirus SEV-gx                     | SEV-gx                          | Macaca mulatta                         | NA    | Pisoniviricetes | Picornavirales | Picornaviridae  | Vertebrates   |
| NC_024073 | Enterovirus sp.                        | CPML_8109/08                    | Mandrillus sphinx                      | NA    | Pisoniviricetes | Picornavirales | Picornaviridae  | Vertebrates   |
| NC_002532 | Equine arteritis virus                 | Bucyrus                         | NA                                     | NA    | Pisoniviricetes | Nidovirales    | Arnidovirineae  | Vertebrates   |
| NC_039209 | Equine rhinitis A virus                | PERV-1                          | horse                                  | NA    | Pisoniviricetes | Picornavirales | Picornaviridae  | Vertebrates   |
| NC_003983 | Equine rhinitis B virus 1              | P1436 /71                       | horse                                  | NA    | Pisoniviricetes | Picornavirales | Picornaviridae  | Vertebrates   |
| NC_043213 | Equine torovirus                       | Berne                           | NA                                     | NA    | Pisoniviricetes | Nidovirales    | Tornidovirineae | Vertebrates   |
| NC_031339 | Euphorbia ringspot virus               | PV-0902                         | Euphorbia milii x lophogona            | NA    | Stelpaviricetes | Patatavirales  | Potyviridae     | Plants        |

|           |                                     |                           |                                               |       |                 |                 |                   |               |
|-----------|-------------------------------------|---------------------------|-----------------------------------------------|-------|-----------------|-----------------|-------------------|---------------|
| NC_002615 | European brown hare syndrome virus  | EBHSV-GD                  | NA                                            | NA    | Pisoniviricetes | Picornavirales  | Caliciviridae     | Vertebrates   |
| NC_032087 | Euscelidius variegatus virus 1      | to-1                      | Euscelidius variegatus                        | NA    | Pisoniviricetes | Picornavirales  | Iflaviridae       | Invertebrates |
| NC_055495 | Faba bean polerovirus 1             | 5253                      | faba bean                                     | NA    | Pisoniviricetes | Sobelivirales   | Solemoviridae     | Plants        |
| NC_035779 | Falcon picornavirus                 | falcon/HA18-080/2014/HUN  | Falco vespertinus                             | NA    | Pisoniviricetes | Picornavirales  | Picornaviridae    | Vertebrates   |
| NC_026921 | Falcovirus A1                       | kestrel/VOVE0622/2013/HUN | Falco tinnunculus (common kestrel)            | NA    | Pisoniviricetes | Picornavirales  | Picornaviridae    | Vertebrates   |
| NC_035675 | Fathead minnow calicivirus          | FHMCV/USA/MN/2012         | Pimephales promelas                           | NA    | Pisoniviricetes | Picornavirales  | Caliciviridae     | Vertebrates   |
| NC_038295 | Fathead minnow nidovirus            | NA                        | Pimephales promelas (fathead minnow)          | NA    | Pisoniviricetes | Nidovirales     | Tornidovirineae   | Vertebrates   |
| NC_039212 | Fathead minnow picornavirus         | FHMPV-1                   | Pimephales promelas                           | NA    | Pisoniviricetes | Picornavirales  | Picornaviridae    | Vertebrates   |
| NC_022249 | Feline astrovirus 2                 | 1637F                     | Felis catus                                   | NA    | Stelpaviricetes | Stellavirales   | Astroviridae      | Vertebrates   |
| NC_024701 | Feline astrovirus D1                | FAstV-D1                  | Felis catus                                   | NA    | Stelpaviricetes | Stellavirales   | Astroviridae      | Vertebrates   |
| NC_001481 | Feline calicivirus                  | Urbana                    | NA                                            | NA    | Pisoniviricetes | Picornavirales  | Caliciviridae     | Vertebrates   |
| NC_002306 | Feline infectious peritonitis virus | 79-1146                   | NA                                            | NA    | Pisoniviricetes | Nidovirales     | Cornidovirineae   | Vertebrates   |
| NC_016156 | Feline picornavirus                 | 073F                      | Felis catus                                   | NA    | Pisoniviricetes | Picornavirales  | Picornaviridae    | Vertebrates   |
| NC_022802 | Feline sakobuvirus A                | FFUP1                     | Felis catus                                   | NA    | Pisoniviricetes | Picornavirales  | Picornaviridae    | Vertebrates   |
| NC_030292 | Ferret coronavirus                  | FRCoV-NL-2010             | Mustela putorius (ferret)                     | NA    | Pisoniviricetes | Nidovirales     | Cornidovirineae   | Vertebrates   |
| NC_034453 | Ferret parechovirus                 | MpPeV1                    | Mustela putorius furo                         | NA    | Pisoniviricetes | Picornavirales  | Picornaviridae    | Vertebrates   |
| NC_039210 | Foot-and-mouth disease virus O      | o6pirbright iso58         | NA                                            | NA    | Pisoniviricetes | Picornavirales  | Picornaviridae    | Vertebrates   |
| NC_026439 | African pouched rat arterivirus     | PREDICT-06509             | Cricetomys emini                              | NA    | Pisoniviricetes | Nidovirales     | Arnidovirineae    | Vertebrates   |
| NC_023021 | Formica exsecta virus 1             | Fex1                      | Formica exsecta                               | NA    | Pisoniviricetes | Picornavirales  | Dicistroviridae   | Invertebrates |
| NC_023022 | Formica exsecta virus 2             | Fex2                      | Formica exsecta                               | NA    | Pisoniviricetes | Picornavirales  | Iflaviridae       | Invertebrates |
| NC_014064 | Freesia mosaic virus                | NA                        | NA                                            | NA    | Stelpaviricetes | Patatavirales   | Potyviridae       | Plants        |
| NC_010954 | Fritillaria virus Y                 | Pan'an                    | Fritillaria thunbergii                        | NA    | Stelpaviricetes | Patatavirales   | Potyviridae       | Plants        |
| NC_030870 | Fusarium poae mycovirus 2           | NA                        | Fusarium poae MAFF 240374                     | NA    | Yadokarivirales | Yadokariviridae | Betayadokarivirus | Fungi         |
| NC_024770 | Gallivirus A1                       | 518C                      | Gallus gallus                                 | NA    | Pisoniviricetes | Picornavirales  | Picornaviridae    | Vertebrates   |
| NC_018400 | Gallivirus A1                       | turkey/M176/2011/HUN      | Meleagris gallopavo (domestic turkey)         | NA    | Pisoniviricetes | Picornavirales  | Picornaviridae    | Vertebrates   |
| NC_028964 | Gallivirus Pf-CHK1/GV               | Pf-CHK1/GV                | Gallus gallus domesticus (domestic chicken)   | NA    | Pisoniviricetes | Picornavirales  | Picornaviridae    | Vertebrates   |
| NC_010306 | Gill-associated virus               | NA                        | Penaes monodon                                | NA    | Pisoniviricetes | Nidovirales     | Ronidovirineae    | Invertebrates |
| NC_038562 | Gloriosa stripe mosaic virus        | CB                        | Sandersonia aurantiaca (Christmas bell)       | NA    | Stelpaviricetes | Patatavirales   | Potyviridae       | Plants        |
| NC_034976 | Goat torovirus                      | SZ                        | Capra hircus                                  | NA    | Pisoniviricetes | Nidovirales     | Tornidovirineae   | Vertebrates   |
| NC_055470 | Gomphocarpus mosaic virus           | NA                        | Gomphocarpus physocarpus                      | 1     | Stelpaviricetes | Patatavirales   | Potyviridae       | Plants        |
| NC_034567 | Goose astrovirus                    | FLX                       | Hortobagy goose                               | NA    | Stelpaviricetes | Stellavirales   | Astroviridae      | Vertebrates   |
| NC_024078 | Goose calicivirus                   | N                         | goose                                         | NA    | Pisoniviricetes | Picornavirales  | Caliciviridae     | Vertebrates   |
| NC_029052 | Goose dicistrovirus                 | UW1                       | goose                                         | NA    | Pisoniviricetes | Picornavirales  | Dicistroviridae   | Invertebrates |
| NC_040684 | Goose picornavirus 1                | goose/NLSZK2/HUN/2013     | Anser albifrons (greater white-fronted goose) | NA    | Pisoniviricetes | Picornavirales  | Picornaviridae    | Vertebrates   |
| NC_026733 | Graminella nigrifrons virus 1       | Ohio                      | Graminella nigrifrons                         | NA    | Pisoniviricetes | Picornavirales  | Iflaviridae       | Invertebrates |
| NC_018383 | Grapevine Anatolian ringspot virus  | A34                       | Vitis vinifera                                | RNA 1 | Pisoniviricetes | Picornavirales  | Secoviridae       | Plants        |
| NC_018384 | Grapevine Anatolian ringspot virus  | NA                        | NA                                            | RNA 2 | Pisoniviricetes | Picornavirales  | Secoviridae       | Plants        |
| NC_015492 | Grapevine Bulgarian latent virus    | Serb1                     | Vitis vinifera                                | 1     | Pisoniviricetes | Picornavirales  | Secoviridae       | Plants        |
| NC_015493 | Grapevine Bulgarian latent virus    | Serb1                     | Vitis vinifera                                | 2     | Pisoniviricetes | Picornavirales  | Secoviridae       | Plants        |
| NC_003622 | Grapevine chrome mosaic virus       | NA                        | NA                                            | RNA 1 | Pisoniviricetes | Picornavirales  | Secoviridae       | Plants        |
| NC_003621 | Grapevine chrome mosaic virus       | NA                        | NA                                            | RNA 2 | Pisoniviricetes | Picornavirales  | Secoviridae       | Plants        |
| NC_017939 | Grapevine deformation virus         | N66                       | Vitis vinifera, cultivar Dimrit               | RNA 1 | Pisoniviricetes | Picornavirales  | Secoviridae       | Plants        |
| NC_017938 | Grapevine deformation virus         | NA                        | NA                                            | RNA 2 | Pisoniviricetes | Picornavirales  | Secoviridae       | Plants        |
| NC_034836 | Grapevine enamovirus 1              | SE-BR                     | Vitis vinifera cv. Semillon                   | NA    | Pisoniviricetes | Sobelivirales   | Solemoviridae     | Plants        |
| NC_039072 | Grapevine fabavirus                 | BB                        | Vitis vinifera cv. Black Beet                 | RNA2  | Pisoniviricetes | Picornavirales  | Secoviridae       | Plants        |

|           |                                           |                          |                                                         |       |                 |                |                 |               |
|-----------|-------------------------------------------|--------------------------|---------------------------------------------------------|-------|-----------------|----------------|-----------------|---------------|
| NC_039073 | Grapevine fabavirus                       | NP                       | Vitis vinifera cv. Nagano Purple                        | RNA1  | Pisoniviricetes | Picornavirales | Secoviridae     | Plants        |
| NC_003623 | Grapevine fanleaf virus                   | F13                      | NA                                                      | NA    | Pisoniviricetes | Picornavirales | Secoviridae     | Plants        |
| NC_003615 | Grapevine fanleaf virus                   | F13                      | NA                                                      | RNA 1 | Pisoniviricetes | Picornavirales | Secoviridae     | Plants        |
| NC_038509 | Groundnut rosette assistor virus          | NA                       | Arachis hypogaea                                        | NA    | Pisoniviricetes | Sobelivirales  | Solemoviridae   | Plants        |
| NC_046959 | Guangdong greater green snake arterivirus | LPSG2430                 | Cyclophiops major                                       | NA    | Pisoniviricetes | Nidovirales    | Arnidovirineae  | Vertebrates   |
| NC_046963 | Guangdong red-banded snake torovirus      | LPSF30546                | Lycodon rufozonatus                                     | NA    | Pisoniviricetes | Nidovirales    | Tornidovirineae | Vertebrates   |
| NC_021786 | Habenaria mosaic virus                    | Ha-1                     | Habenaria radiata (terrestrial orchid)                  | NA    | Stelpaviricetes | Patatavirales  | Potyviridae     | Plants        |
| NC_043544 | rafivirus B1                              | LPXYC222841              | Gekko similignum                                        | NA    | Pisoniviricetes | Picornavirales | Picornaviridae  | Vertebrates   |
| NC_046958 | Hainan oligodon formosanus arterivirus    | LPSF32245                | Oligodon formosanus                                     | NA    | Pisoniviricetes | Nidovirales    | Arnidovirineae  | Vertebrates   |
| NC_022611 | Halyomorpha halys virus                   | Beltsville               | Halyomorpha halys                                       | NA    | Pisoniviricetes | Picornavirales | Iflaviridae     | Invertebrates |
| NC_020899 | Alphamesonivirus 2                        | A4/CI/2004               | Culex sp.                                               | NA    | Pisoniviricetes | Nidovirales    | Mesnidovirineae | Invertebrates |
| NC_015394 | Hardenbergia mosaic virus                 | HarMV-57.2               | Hardenbergia comptoniana                                | NA    | Stelpaviricetes | Patatavirales  | Potyviridae     | Plants        |
| NC_034617 | Harrier picornavirus 1                    | harrier/MR-01/HUN/2014   | Circus aeruginosus (Western Marsh-harrier)              | NA    | Pisoniviricetes | Picornavirales | Picornaviridae  | Vertebrates   |
| NC_040611 | Hedgehog dicipivirus                      | hedgehog/H14/2015/HUN    | Erinaceus roumanicus (Northern white-breasted hedgehog) | NA    | Pisoniviricetes | Picornavirales | Picornaviridae  | Vertebrates   |
| NC_028365 | Hedgehog hepatovirus Igel8Erieur2014      | Igel8Erieur2014          | Erinaceus europaeus                                     | NA    | Pisoniviricetes | Picornavirales | Picornaviridae  | Vertebrates   |
| NC_024016 | Heliconius erato iflavivirus              | HeratoCRSEC              | Heliconius erato                                        | NA    | Pisoniviricetes | Picornavirales | Iflaviridae     | Invertebrates |
| NC_033619 | Helicoverpa armigera iflavivirus          | HBFLF2013-1              | Helicoverpa armigera (cotton bollworm)                  | NA    | Pisoniviricetes | Picornavirales | Iflaviridae     | Invertebrates |
| NC_001489 | Hepatovirus A                             | NA                       | NA                                                      | NA    | Pisoniviricetes | Picornavirales | Picornaviridae  | Vertebrates   |
| NC_028366 | hepatovirus H2                            | M32Eidhel2010            | Eidolon helvum                                          | NA    | Pisoniviricetes | Picornavirales | Picornaviridae  | Vertebrates   |
| NC_007518 | Heterocapsa circularisquama RNA virus 01  | HcRNAV34                 | NA                                                      | NA    | Pisoniviricetes | Sobelivirales  | Alvernaviridae  | Chromista     |
| NC_005281 | Heterosigma akashiwo RNA virus            | HaRNAV-SOG263            | NA                                                      | NA    | Pisoniviricetes | Picornavirales | Marnaviridae    | Chromista     |
| NC_003782 | Himetobi P virus                          | NA                       | Laodelphax striatellus                                  | NA    | Pisoniviricetes | Picornavirales | Dicistroviridae | Invertebrates |
| NC_017967 | Hippeastrum mosaic virus                  | Marijiniup 1             | Hippeastrum sp.                                         | NA    | Stelpaviricetes | Patatavirales  | Potyviridae     | Plants        |
| NC_013443 | HMO Astrovirus A                          | NI-295                   | Homo sapiens                                            | NA    | Stelpaviricetes | Stellavirales  | Astroviridae    | Vertebrates   |
| NC_034444 | Hom-1 vesivirus                           | Hom-1                    | NA                                                      | NA    | Pisoniviricetes | Picornavirales | Caliciviridae   | Vertebrates   |
| NC_008029 | Homalodisca coagulata virus 1             | NA                       | NA                                                      | NA    | Pisoniviricetes | Picornavirales | Dicistroviridae | Invertebrates |
| NC_005904 | Hordeum mosaic virus                      | ATCC PV81                | NA                                                      | NA    | Stelpaviricetes | Patatavirales  | Potyviridae     | Plants        |
| NC_033152 | Hubei picorna-like virus 81               | QTM27117                 | Odonata                                                 | NA    | Pisoniviricetes | Picornavirales | Polycipiviridae | Invertebrates |
| NC_032222 | Hubei picorna-like virus 82               | spider133992             | spiders                                                 | NA    | Pisoniviricetes | Picornavirales | Polycipiviridae | Invertebrates |
| NC_032912 | Hubei Poty-like virus 1                   | SCM51506                 | Diptera                                                 | NA    | Stelpaviricetes | Patatavirales  | Potyviridae     | Plants        |
| NC_024472 | Human astrovirus BF34                     | BF34                     | Homo sapiens                                            | NA    | Stelpaviricetes | Stellavirales  | Astroviridae    | Vertebrates   |
| NC_001943 | Human astrovirus                          | NA                       | NA                                                      | NA    | Stelpaviricetes | Stellavirales  | Astroviridae    | Vertebrates   |
| NC_002645 | Human coronavirus 229E                    | NA                       | NA                                                      | NA    | Pisoniviricetes | Nidovirales    | Cornidovirineae | Vertebrates   |
| NC_005831 | Human coronavirus NL63                    | Amsterdam 1              | NA                                                      | NA    | Pisoniviricetes | Nidovirales    | Cornidovirineae | Vertebrates   |
| NC_006213 | Human coronavirus OC43                    | ATCC VR-759              | NA                                                      | NA    | Pisoniviricetes | Nidovirales    | Cornidovirineae | Vertebrates   |
| NC_012801 | Human cosavirus B                         | 2263                     | Homo sapiens                                            | NA    | Pisoniviricetes | Picornavirales | Picornaviridae  | Vertebrates   |
| NC_012802 | Cosavirus D                               | 5004                     | Homo sapiens                                            | NA    | Pisoniviricetes | Picornavirales | Picornaviridae  | Vertebrates   |
| NC_012798 | Cosavirus E                               | HCoSV-E1                 | Homo sapiens                                            | NA    | Pisoniviricetes | Picornavirales | Picornaviridae  | Vertebrates   |
| NC_034385 | Cosavirus F                               | PK5006                   | Homo sapiens                                            | NA    | Pisoniviricetes | Picornavirales | Picornaviridae  | Vertebrates   |
| NC_023984 | Human cosavirus                           | Cosavirus_Amsterdam_1994 | Homo sapiens                                            | NA    | Pisoniviricetes | Picornavirales | Picornaviridae  | Vertebrates   |
| NC_038306 | Coxsackievirus A2                         | CA2                      | NA                                                      | NA    | Pisoniviricetes | Picornavirales | Picornaviridae  | Vertebrates   |
| NC_038308 | enterovirus D68                           | Fermon                   | NA                                                      | NA    | Pisoniviricetes | Picornavirales | Picornaviridae  | Vertebrates   |
| NC_001612 | Enterovirus A                             | NA                       | NA                                                      | NA    | Pisoniviricetes | Picornavirales | Picornaviridae  | Vertebrates   |
| NC_001472 | Enterovirus B                             | NA                       | NA                                                      | NA    | Pisoniviricetes | Picornavirales | Picornaviridae  | Vertebrates   |
| NC_001430 | Enterovirus D                             | Enterovirus 70           | NA                                                      | NA    | Pisoniviricetes | Picornavirales | Picornaviridae  | Vertebrates   |
| NC_001897 | Parechovirus A                            | Gregory                  | NA                                                      | NA    | Pisoniviricetes | Picornavirales | Picornaviridae  | Vertebrates   |
| NC_038311 | rhinovirus A1                             | ATCC VR-1559             | NA                                                      | NA    | Pisoniviricetes | Picornavirales | Picornaviridae  | Vertebrates   |
| NC_038312 | rhinovirus B3                             | NA                       | NA                                                      | NA    | Pisoniviricetes | Picornavirales | Picornaviridae  | Vertebrates   |
| NC_001617 | Rhinovirus A                              | NA                       | NA                                                      | NA    | Pisoniviricetes | Picornavirales | Picornaviridae  | Vertebrates   |

|           |                                              |                             |                                                |       |                 |                |                 |               |
|-----------|----------------------------------------------|-----------------------------|------------------------------------------------|-------|-----------------|----------------|-----------------|---------------|
| NC_009996 | Rhinovirus C                                 | 24                          | NA                                             | NA    | Pisoniviricetes | Picornavirales | Picornaviridae  | Vertebrates   |
| NC_038878 | Human rhinovirus NAT001                      | NAT001                      | NA                                             | NA    | Pisoniviricetes | Picornavirales | Picornaviridae  | Vertebrates   |
| NC_010810 | Human TMEV-like cardiovirus                  | NA                          | NA                                             | NA    | Pisoniviricetes | Picornavirales | Picornaviridae  | Vertebrates   |
| NC_037051 | Hyacinth mosaic virus                        | Nannup BC28                 | Hyacinthus orientalis                          | NA    | Stelpaviricetes | Patatavirales  | Potyviridae     | Plants        |
| NC_030236 | Impatiens flower break virus                 | Asan                        | Impatiens walleriana hook.                     | NA    | Stelpaviricetes | Patatavirales  | Potyviridae     | Plants        |
| NC_011536 | Imperata yellow mottle virus                 | NA                          | Imperata cylindrica                            | NA    | Pisoniviricetes | Sobelivirales  | Solemoviridae   | Plants        |
| NC_048213 | Infectious bronchitis virus                  | Ind-TN92-03                 | chicken                                        | NA    | Pisoniviricetes | Nidovirales    | Cornidovirineae | Vertebrates   |
| NC_003781 | Infectious flacherie virus                   | NA                          | NA                                             | NA    | Pisoniviricetes | Picornavirales | Iflaviridae     | Invertebrates |
| NC_018833 | Iranian johnsongrass mosaic virus            | Shz                         | Johnson grass                                  | NA    | Stelpaviricetes | Patatavirales  | Potyviridae     | Plants        |
| NC_029076 | Iris severe mosaic virus                     | BJ                          | iris                                           | NA    | Stelpaviricetes | Patatavirales  | Potyviridae     | Plants        |
| NC_009025 | Israeli acute paralysis virus                | NA                          | NA                                             | NA    | Pisoniviricetes | Picornavirales | Dicistroviridae | Invertebrates |
| NC_000947 | Japanese yam mosaic virus                    | NA                          | NA                                             | NA    | Stelpaviricetes | Patatavirales  | Potyviridae     | Plants        |
| NC_029051 | Jasmine virus T                              | NA                          | jasmine                                        | NA    | Stelpaviricetes | Patatavirales  | Potyviridae     | Plants        |
| NC_003606 | Johnsongrass mosaic virus                    | NA                          | NA                                             | NA    | Stelpaviricetes | Patatavirales  | Potyviridae     | Plants        |
| NC_043488 | Kadiweu virus                                | BrMS-MQ10                   | Culex (Culex) sp.                              | NA    | Pisoniviricetes | Nidovirales    | Mesnidovirineae | Invertebrates |
| NC_029053 | Kafue kinda chacma baboon virus              | KKCBV-1                     | Chlorocebus pygerythrus                        | NA    | Pisoniviricetes | Nidovirales    | Arnidovirineae  | Vertebrates   |
| NC_038296 | Karang Sari virus                            | JKT10701                    | Culex vishnui                                  | NA    | Pisoniviricetes | Nidovirales    | Mesnidovirineae | Invertebrates |
| NC_004807 | Kashmir bee virus                            | NA                          | NA                                             | NA    | Pisoniviricetes | Picornavirales | Dicistroviridae | Invertebrates |
| NC_016159 | Keunjorong mosaic virus                      | Cheongwon                   | Cynanchum wilfordii                            | NA    | Stelpaviricetes | Patatavirales  | Potyviridae     | Plants        |
| NC_033553 | Kibale red colobus virus 1                   | SHFV-krc1_RC61              | Piliocolobus tephrosceles (red colobus monkey) | NA    | Pisoniviricetes | Nidovirales    | Arnidovirineae  | Vertebrates   |
| NC_034455 | Kibale red colobus virus 2                   | SHFV-krc2_RC61              | Piliocolobus tephrosceles (red colobus monkey) | NA    | Pisoniviricetes | Nidovirales    | Arnidovirineae  | Vertebrates   |
| NC_038292 | Kibale red-tailed guenon virus 1             | krtg05                      | red-tailed guenon                              | NA    | Pisoniviricetes | Nidovirales    | Arnidovirineae  | Vertebrates   |
| NC_027126 | Kilifi Virus                                 | NA                          | large pool of wild-caught Drosophila           | NA    | Pisoniviricetes | Picornavirales |                 | Invertebrates |
| NC_031749 | King virus                                   | UWV2                        | Yuma myotis                                    | NA    | Pisoniviricetes | Picornavirales | Iflaviridae     | Unknown       |
| NC_027919 | Kobuvirus                                    | Kagoshima-1-22-KoV/2014/JPN | Bos taurus                                     | NA    | Pisoniviricetes | Picornavirales | Picornaviridae  | Vertebrates   |
| NC_027918 | Kobuvirus cattle/Kagoshima-2-24-KoV/2015/JPN | Kagoshima-2-24-KoV/2015/JPN | Bos taurus                                     | NA    | Pisoniviricetes | Picornavirales | Picornaviridae  | Vertebrates   |
| NC_007913 | Konjac mosaic virus                          | KoMV-F                      | Amorphophallus konjac K. Koch (Konjak)         | NA    | Stelpaviricetes | Patatavirales  | Potyviridae     | Plants        |
| NC_038317 | Kunsagivirus A                               | roller/SZAL6-KuV/2011/HUN   | Coracias garrulus (European roller)            | NA    | Pisoniviricetes | Picornavirales | Picornaviridae  | Vertebrates   |
| NC_033818 | Kunsagivirus B                               | NA                          | Eidolon helvum                                 | NA    | Pisoniviricetes | Picornavirales | Picornaviridae  | Vertebrates   |
| NC_027128 | La Jolla virus                               | MAT03                       | large pool of wild-caught Drosophila           | NA    | Pisoniviricetes | Picornavirales | Iflaviridae     | Invertebrates |
| NC_001639 | Lactate dehydrogenase-elevating virus        | Plagemann                   | NA                                             | NA    | Pisoniviricetes | Nidovirales    | Arnidovirineae  | Vertebrates   |
| NC_023016 | Lamium mild mosaic virus                     | DSMZ PV-0454                | Lamium album                                   | RNA 1 | Pisoniviricetes | Picornavirales | Secoviridae     | Plants        |
| NC_023017 | Lamium mild mosaic virus                     | DSMZ PV-0454                | Lamium album                                   | RNA 2 | Pisoniviricetes | Picornavirales | Secoviridae     | Plants        |
| NC_023627 | Laodelphax striatella honeydew virus 1       | Nanjing                     | Laodelphax striatella                          | NA    | Pisoniviricetes | Picornavirales | Iflaviridae     | Invertebrates |
| NC_025788 | Laodelphax striatellus picorna-like virus 2  | LsPV2                       | Laodelphax striatella                          | NA    | Pisoniviricetes | Picornavirales | Iflaviridae     | Invertebrates |
| NC_035450 | Lasius neglectus virus 1                     | Cambridge-Lne               | Lasius neglectus (ant)                         | NA    | Pisoniviricetes | Picornavirales | Polycipiviridae | Invertebrates |
| NC_035456 | Lasius niger virus 1                         | Cambridge-Lni               | Lasius niger (ant)                             | NA    | Pisoniviricetes | Picornavirales | Polycipiviridae | Invertebrates |
| NC_004011 | Leek yellow stripe virus                     | Yuhang GYH                  | garlic                                         | NA    | Stelpaviricetes | Patatavirales  | Potyviridae     | Plants        |
| NC_043487 | Lelystad virus                               | NA                          | NA                                             | NA    | Pisoniviricetes | Nidovirales    | Arnidovirineae  | Vertebrates   |
| NC_026315 | Lesavirus 1                                  | Mis101308/2012              | Lemur catta                                    | NA    | Pisoniviricetes | Picornavirales | Picornaviridae  | Vertebrates   |
| NC_026316 | Lesavirus 2                                  | Nai108015/2012              | Varecia variegata                              | NA    | Pisoniviricetes | Picornavirales | Picornaviridae  | Vertebrates   |
| NC_027706 | Lettuce Italian necrotic virus               | I234                        | Lactuca sativa cv. Romana                      | NA    | Stelpaviricetes | Patatavirales  | Potyviridae     | Plants        |
| NC_003605 | Lettuce mosaic virus                         | E                           | NA                                             | NA    | Stelpaviricetes | Patatavirales  | Potyviridae     | Plants        |
| NC_035214 | Lettuce necrotic leaf curl virus             | 5317015                     | Lactuca sativa                                 | RNA 1 | Pisoniviricetes | Picornavirales | Secoviridae     | Plants        |
| NC_035219 | Lettuce necrotic leaf curl virus             | 5317015                     | Lactuca sativa                                 | RNA 2 | Pisoniviricetes | Picornavirales | Secoviridae     | Plants        |

|           |                                       |                          |                                       |       |                 |                |                 |               |
|-----------|---------------------------------------|--------------------------|---------------------------------------|-------|-----------------|----------------|-----------------|---------------|
| NC_005288 | Lily mottle virus                     | Sb                       | Lilium sp. cv. Sorbonne               | NA    | Stelpaviricetes | Patatavirales  | Potyviridae     | Plants        |
| NC_040802 | Lily yellow mosaic virus              | lily-bua                 | lily                                  | NA    | Stelpaviricetes | Patatavirales  | Potyviridae     | Plants        |
| NC_032126 | livupivirus A1                        | newt/II-5-Pilis/2014/HUN | Lissotriton vulgaris (smooth newt)    | NA    | Pisoniviricetes | Picornavirales | Picornaviridae  | Vertebrates   |
| NC_003976 | Ljungan virus                         | 87-012                   | NA                                    | NA    | Pisoniviricetes | Picornavirales | Picornaviridae  | Vertebrates   |
| NC_034835 | Longan witches broom-associated virus | Han1                     | longan                                | NA    | Stelpaviricetes | Patatavirales  | Potyviridae     | Plants        |
| NC_001696 | Lucerne transient streak virus        | LTSV-Can                 | Medicago sativa                       | NA    | Pisoniviricetes | Sobelivirales  | Solemoviridae   | Plants        |
| NC_032730 | Lucheng Rn rat coronavirus            | Lucheng-19               | Rattus norvegicus                     | NA    | Pisoniviricetes | Nidovirales    | Cornidovirineae | Vertebrates   |
| NC_027703 | Luffa aphid-borne yellows virus       | TH24                     | Luffa acutangula                      | NA    | Pisoniviricetes | Sobelivirales  | Solemoviridae   | Plants        |
| NC_014898 | Lupinus mosaic virus                  | LU2                      | Lupinus polyphyllus                   | NA    | Stelpaviricetes | Patatavirales  | Potyviridae     | Plants        |
| NC_038301 | Lygus lineolaris virus 1              | LIV-1                    | Lygus lineolaris                      | NA    | Pisoniviricetes | Picornavirales | Iflaviridae     | Invertebrates |
| NC_024497 | Lymantria dispar iflavivirus 1        | Ames                     | NA                                    | NA    | Pisoniviricetes | Picornavirales | Iflaviridae     | Invertebrates |
| NC_018570 | Macrobrachium rosenbergii Taihu virus | cn-taihu100401           | Macrobrachium rosenbergii             | NA    | Pisoniviricetes | Picornavirales | Dicistroviridae | Invertebrates |
| NC_016993 | Magpie-robin coronavirus HKU18        | HKU18-chu3               | magpie-robin                          | NA    | Pisoniviricetes | Nidovirales    | Cornidovirineae | Vertebrates   |
| NC_003626 | Maize chlorotic dwarf virus           | Tennessee (TN)           | NA                                    | NA    | Pisoniviricetes | Picornavirales | Secoviridae     | Plants        |
| NC_003377 | Maize dwarf mosaic virus              | Bulgaria                 | NA                                    | NA    | Stelpaviricetes | Patatavirales  | Potyviridae     | Plants        |
| NC_021484 | Maize yellow dwarf virus RMV          | RMV MTFE87               | Triticum aestivum                     | NA    | Pisoniviricetes | Sobelivirales  | Solemoviridae   | Plants        |
| NC_029990 | Maize yellow dwarf virus-RMV2         | NA                       | maize                                 | NA    | Pisoniviricetes | Sobelivirales  | Solemoviridae   | Plants        |
| NC_030922 | Mamastrovirus 1                       | V1347                    | NA                                    | NA    | Stelpaviricetes | Stellavirales  | Astroviridae    | Vertebrates   |
| NC_043102 | Mamastrovirus 18                      | AFCD337                  | Miniopterus pusillus                  | NA    | Stelpaviricetes | Stellavirales  | Astroviridae    | Vertebrates   |
| NC_034974 | Mamastrovirus 2                       | K321                     | pig                                   | NA    | Stelpaviricetes | Stellavirales  | Astroviridae    | Vertebrates   |
| NC_025379 | Mamastrovirus 3                       | PAstV-GX1                | swine                                 | NA    | Stelpaviricetes | Stellavirales  | Astroviridae    | Vertebrates   |
| NC_043541 | Marine RNA virus BC-1                 | NA                       | NA                                    | NA    | Pisoniviricetes | Picornavirales | Marnaviridae    | Chromista     |
| NC_043542 | Marine RNA virus BC-2                 | NA                       | NA                                    | NA    | Pisoniviricetes | Picornavirales | Marnaviridae    | Chromista     |
| NC_043543 | Marine RNA virus BC-3                 | NA                       | NA                                    | NA    | Pisoniviricetes | Picornavirales | Marnaviridae    | Chromista     |
| NC_043682 | Marine RNA virus BC-4                 | NA                       | NA                                    | NA    | Pisoniviricetes | Picornavirales | Marnaviridae    | Chromista     |
| NC_009757 | Marine RNA virus JP-A                 | NA                       | NA                                    | NA    | Pisoniviricetes | Picornavirales | Marnaviridae    | Chromista     |
| NC_009758 | Marine RNA virus JP-B                 | NA                       | NA                                    | NA    | Pisoniviricetes | Picornavirales | Marnaviridae    | Chromista     |
| NC_029306 | Marine RNA virus PAL128               | NA                       | NA                                    | NA    | Pisoniviricetes | Picornavirales | Marnaviridae    | Chromista     |
| NC_029307 | Marine RNA virus PAL156               | NA                       | NA                                    | NA    | Pisoniviricetes | Picornavirales | Marnaviridae    | Chromista     |
| NC_029309 | Marine RNA virus PAL473               | NA                       | NA                                    | NA    | Pisoniviricetes | Picornavirales | Marnaviridae    | Chromista     |
| NC_043515 | Marine RNA virus SF-1                 | NA                       | NA                                    | NA    | Pisoniviricetes | Picornavirales | Marnaviridae    | Chromista     |
| NC_043518 | Marine RNA virus SF-2                 | NA                       | NA                                    | NA    | Pisoniviricetes | Picornavirales | Marnaviridae    | Chromista     |
| NC_043519 | Marine RNA virus SF-3                 | SF-3                     | NA                                    | NA    | Pisoniviricetes | Picornavirales | Marnaviridae    | Chromista     |
| NC_040674 | Marmot norovirus                      | HT16                     | Marmota himalayana                    | NA    | Pisoniviricetes | Picornavirales | Caliciviridae   | Vertebrates   |
| NC_040605 | Marmot sapelovirus 1                  | HT5                      | Marmota himalayana                    | NA    | Pisoniviricetes | Picornavirales | Picornaviridae  | Vertebrates   |
| NC_055496 | Mashua virus Y                        | Cam                      | Tropaeolum tuberosum                  | NA    | Stelpaviricetes | Patatavirales  | Potyviridae     | Plants        |
| NC_043536 | Mediterranean ruda virus              | ParP17                   | NA                                    | NA    | Stelpaviricetes | Patatavirales  | Potyviridae     | Plants        |
| NC_024120 | megrivirus A2                         | LY                       | Anas platyrhynchos                    | NA    | Pisoniviricetes | Picornavirales | Picornaviridae  | Vertebrates   |
| NC_033793 | megrivirus B3CP-APO                   | HN56                     | goose                                 | NA    | Pisoniviricetes | Picornavirales | Picornaviridae  | Vertebrates   |
| NC_024769 | megrivirus C2                         | 27C                      | Gallus gallus                         | NA    | Pisoniviricetes | Picornavirales | Picornaviridae  | Vertebrates   |
| NC_023858 | Melegrivirus A                        | turkey/B407-THV/2011/HUN | Meleagris gallopavo (domestic turkey) | NA    | Pisoniviricetes | Picornavirales | Picornaviridae  | Vertebrates   |
| NC_010809 | Melon aphid-borne yellows virus       | NA                       | Benincasa hispida                     | NA    | Pisoniviricetes | Sobelivirales  | Solemoviridae   | Plants        |
| NC_038765 | Melon mild mottle virus               | NA                       | Cucumis melo                          | RNA 1 | Pisoniviricetes | Picornavirales | Secoviridae     | Plants        |
| NC_038766 | Melon mild mottle virus               | NA                       | Cucumis melo                          | RNA 2 | Pisoniviricetes | Picornavirales | Secoviridae     | Plants        |
| NC_020900 | Alphamesonivirus 3                    | E9/CI/2004               | Uranotaenia chorleyi                  | NA    | Pisoniviricetes | Nidovirales    | Mesnidovirineae | Invertebrates |
| NC_019843 | Middle East respiratory               | HCoV-EMC/2012            | Homo sapiens                          | NA    | Pisoniviricetes | Nidovirales    | Cornidovirineae | Vertebrates   |

|           |                                            |                        |                                              |       |                 |                |                 |               |
|-----------|--------------------------------------------|------------------------|----------------------------------------------|-------|-----------------|----------------|-----------------|---------------|
|           | syndrome-related coronavirus               |                        |                                              |       |                 |                |                 |               |
| NC_011190 | Mikania micrantha mosaic virus             | GZ1                    | NA                                           | RNA 1 | Pisoniviricetes | Picornavirales | Secoviridae     | Plants        |
| NC_011189 | Mikania micrantha mosaic virus             | GZ1                    | NA                                           | RNA 2 | Pisoniviricetes | Picornavirales | Secoviridae     | Plants        |
| NC_025112 | Mikumi yellow baboon virus 1               | MYBV_M58               | Papio cynocephalus                           | NA    | Pisoniviricetes | Nidovirales    | Arnidovirineae  | Vertebrates   |
| NC_010438 | Miniopterus bat coronavirus HKU8           | AFC77                  | NA                                           | NA    | Pisoniviricetes | Nidovirales    | Cornidovirineae | Vertebrates   |
| NC_034381 | Miniopterus schreibersii picornavirus 1    | NA                     | Miniopterus schreibersii                     | NA    | Pisoniviricetes | Picornavirales | Picornaviridae  | Vertebrates   |
| NC_004579 | Mamastrovirus 10                           | NA                     | NA                                           | NA    | Stelpaviricetes | Stellavirales  | Astroviridae    | Vertebrates   |
| NC_019712 | Mink calicivirus                           | MCV-DL/2007/CN         | mink                                         | NA    | Pisoniviricetes | Picornavirales | Caliciviridae   | Vertebrates   |
| NC_023760 | Mink coronavirus strain WD1127             | WD1127                 | Mustela vison                                | NA    | Pisoniviricetes | Nidovirales    | Cornidovirineae | Vertebrates   |
| NC_031338 | Moku virus                                 | Big Island             | Vespula pensylvanica                         | NA    | Pisoniviricetes | Picornavirales | Iflaviridae     | Invertebrates |
| NC_035465 | Morelia viridis nidovirus                  | S14-1323_MVNV          | Morelia viridis                              | NA    | Pisoniviricetes | Nidovirales    | Tornidovirineae | Vertebrates   |
| NC_009995 | Moroccan watermelon mosaic virus           | TN05-76                | zucchini                                     | NA    | Stelpaviricetes | Patatavirales  | Potyviridae     | Plants        |
| NC_023987 | Mosavirus A2                               | SZAL6-MoV/2011/HUN FHI | Coracias garrulus (European roller) mosquito | NA    | Pisoniviricetes | Picornavirales | Picornaviridae  | Vertebrates   |
| NC_031688 | Mosquito dicistrovirus                     |                        |                                              | NA    | Pisoniviricetes | Picornavirales | Dicistroviridae | Invertebrates |
| NC_035218 | Motherwort yellow mottle virus             | AD01                   | Motherwort                                   | RNA 1 | Pisoniviricetes | Picornavirales | Secoviridae     | Plants        |
| NC_035220 | Motherwort yellow mottle virus             | AD01                   | Motherwort                                   | RNA 2 | Pisoniviricetes | Picornavirales | Secoviridae     | Plants        |
| NC_015935 | Mouse astrovirus M-52/USA/2008             | M-52                   | Mus musculus                                 | NA    | Stelpaviricetes | Stellavirales  | Astroviridae    | Vertebrates   |
| NC_015936 | Mouse kobuvirus M-5/USA/2010               | M-5                    | Peromyscus crinitus                          | NA    | Pisoniviricetes | Picornavirales | Picornaviridae  | Vertebrates   |
| NC_038318 | Mouse Mosavirus                            | Mosa.M-7               | Peromyscus crinitus                          | NA    | Pisoniviricetes | Picornavirales | Picornaviridae  | Vertebrates   |
| NC_014793 | Mud crab virus                             | NA                     | Scylla serrata (mud crab)                    | NA    | Pisoniviricetes | Picornavirales | Dicistroviridae | Invertebrates |
| NC_038767 | Mulberry mosaic leaf roll associated virus | zj                     | Morus alba L.                                | RNA1  | Pisoniviricetes | Picornavirales | Secoviridae     | Plants        |
| NC_038768 | Mulberry mosaic leaf roll associated virus | zj                     | Morus alba L.                                | RNA2  | Pisoniviricetes | Picornavirales | Secoviridae     | Plants        |
| NC_011550 | Munia coronavirus HKU13-3514               | NA                     | white-rumped munia                           | NA    | Pisoniviricetes | Nidovirales    | Cornidovirineae | Vertebrates   |
| NC_018702 | Murine astrovirus                          | STL 1                  | NA                                           | NA    | Stelpaviricetes | Stellavirales  | Astroviridae    | Vertebrates   |
| NC_048217 | Murine hepatitis virus                     | A59                    | NA                                           | NA    | Pisoniviricetes | Nidovirales    | Cornidovirineae | Vertebrates   |
| AC_000192 | Murine hepatitis virus strain JHM          | NA                     | NA                                           | NA    | Pisoniviricetes | Nidovirales    | Cornidovirineae | Vertebrates   |
| NC_001846 | Murine hepatitis virus                     | MHV-A59                | NA                                           | NA    | Pisoniviricetes | Nidovirales    | Cornidovirineae | Vertebrates   |
| NC_001633 | Mushroom bacilliform virus                 | NA                     | NA                                           | NA    | Pisoniviricetes | Sobelvirales   | Barnaviridae    | Fungi         |
| NC_035457 | Myrmica scabrinodis virus 1                | Cambridge-Msc          | Myrmica scabrinodis (ant)                    | NA    | Pisoniviricetes | Picornavirales | Polycipiviridae | Invertebrates |
| NC_015874 | Nam Dinh virus                             | 02VN178                | mosquito                                     | NA    | Pisoniviricetes | Nidovirales    | Mesnidovirineae | Invertebrates |
| NC_046960 | Nanhai ghost shark arterivirus             | NHYJS6157              | Chimaera sp.                                 | NA    | Pisoniviricetes | Nidovirales    | Nanidovirineae  | Vertebrates   |
| NC_008824 | Narcissus degeneration virus               | Zhangzhou              | Narcissus tazetta (Chinese narcissus)        | NA    | Stelpaviricetes | Patatavirales  | Potyviridae     | Plants        |
| NC_023628 | Narcissus late season yellows virus        | Marijiniup8            | Narcissus sp.                                | NA    | Stelpaviricetes | Patatavirales  | Potyviridae     | Plants        |
| NC_011541 | Narcissus yellow stripe virus              | Zhangzhou              | Narcissus tazetta var. chinensis             | NA    | Stelpaviricetes | Patatavirales  | Potyviridae     | Plants        |
| NC_004064 | Nebraska virus                             | NB                     | NA                                           | NA    | Pisoniviricetes | Picornavirales | Caliciviridae   | Vertebrates   |
| NC_040798 | Nephila clavipes virus 1                   | SC                     | Nephila clavipes                             | NA    | Pisoniviricetes | Picornavirales |                 | Invertebrates |
| NC_040542 | Nephila clavipes virus 2                   | SC                     | Nephila clavipes                             | NA    | Pisoniviricetes | Picornavirales |                 | Invertebrates |
| NC_040675 | Nesidiocoris tenuis iflavivirus 1          | SD                     | NA                                           | NA    | Pisoniviricetes | Picornavirales | Iflaviridae     | Invertebrates |
| NC_007916 | Newbury agent 1                            | NA                     | cattle                                       | NA    | Pisoniviricetes | Picornavirales | Caliciviridae   | Vertebrates   |
| NC_016994 | Night heron coronavirus HKU19              | HKU19-6918             | night-heron                                  | NA    | Pisoniviricetes | Nidovirales    | Cornidovirineae | Vertebrates   |
| NC_038302 | Nilaparvata lugens honeydew virus 1        | Izumo                  | Nilaparvata lugens                           | NA    | Pisoniviricetes | Picornavirales | Iflaviridae     | Invertebrates |
| NC_021566 | Nilaparvata lugens honeydew virus-2        | Izumo                  | Nilaparvata lugens                           | NA    | Pisoniviricetes | Picornavirales | Iflaviridae     | Invertebrates |



|           |                                                       |                                          |                                               |       |                 |                |                 |               |
|-----------|-------------------------------------------------------|------------------------------------------|-----------------------------------------------|-------|-----------------|----------------|-----------------|---------------|
| NC_021567 | Nilaparvata lugens honeydew virus-3                   | Kagoshima                                | Nilaparvata lugens                            | NA    | Pisoniviricetes | Picornavirales | Iflaviridae     | Invertebrates |
| NC_032107 | NL63-related bat coronavirus                          | BtKYNL63-9a                              | Trienops afer                                 | NA    | Pisoniviricetes | Nidovirales    | Cornidovirineae | Vertebrates   |
| NC_048216 | NL63-related bat coronavirus                          | BtKYNL63-9b                              | Trienops afer                                 | NA    | Pisoniviricetes | Nidovirales    | Cornidovirineae | Vertebrates   |
| NC_055585 | Noni mosaic virus                                     | NoMV-YJh                                 | Morinda citrifolia                            | NA    | Stelpaviricetes | Patatavirales  | Potyviridae     | Plants        |
| NC_044047 | Norovirus dog/GV1.1/HKU_Ca026F/2007/HKG               | dog/GV1.1/HKU_Ca026F/2007/HKG            | Canis lupus familiaris                        | NA    | Pisoniviricetes | Picornavirales | Caliciviridae   | Vertebrates   |
| NC_044856 | Norovirus GI                                          | Hu/BD/2011/GL7[PNA2]/Dhaka1882           | Homo sapiens                                  | NA    | Pisoniviricetes | Picornavirales | Caliciviridae   | Vertebrates   |
| NC_044853 | Norovirus GI                                          | Hu/JP/1998/GL6[PNA4]/No20-Saitama-98-17  | Homo sapiens                                  | NA    | Pisoniviricetes | Picornavirales | Caliciviridae   | Vertebrates   |
| NC_044854 | Norovirus GI                                          | Hu/JP/2000/GL6[PNA1]/WUG1                | Homo sapiens                                  | NA    | Pisoniviricetes | Picornavirales | Caliciviridae   | Vertebrates   |
| NC_001959 | Norovirus GI                                          | NA                                       | NA                                            | NA    | Pisoniviricetes | Picornavirales | Caliciviridae   | Vertebrates   |
| NC_039897 | Norovirus GI/Hu/JP/2007/GLP3_GI.3/Shimizu/KK2866      | Shimizu/KK2866                           | Homo sapiens                                  | NA    | Pisoniviricetes | Picornavirales | Caliciviridae   | Vertebrates   |
| NC_044932 | Norovirus GII                                         | Hu/GII.PNA4-GII.NA4/PNV06929/2008/PER    | Homo sapiens                                  | NA    | Pisoniviricetes | Picornavirales | Caliciviridae   | Vertebrates   |
| NC_029646 | Norwalk-like virus                                    | Hu/Norovirus/hir oshima/1999/JP9912-02F) | NA                                            | NA    | Pisoniviricetes | Picornavirales | Caliciviridae   | Vertebrates   |
| NC_039477 | Norovirus GII                                         | NORO_226_06_01_2016                      | Homo sapiens                                  | NA    | Pisoniviricetes | Picornavirales | Caliciviridae   | Vertebrates   |
| NC_039475 | Norovirus GII.17                                      | Hu/GII.P17_GII.17/KR/2015/CAU-267        | Homo sapiens                                  | NA    | Pisoniviricetes | Picornavirales | Caliciviridae   | Vertebrates   |
| NC_039476 | Norovirus GII.2                                       | BJSMQ                                    | NA                                            | NA    | Pisoniviricetes | Picornavirales | Caliciviridae   | Vertebrates   |
| NC_040876 | Norovirus GII                                         | NORO_176-1_17_12_2015                    | Homo sapiens                                  | NA    | Pisoniviricetes | Picornavirales | Caliciviridae   | Vertebrates   |
| NC_044045 | Norovirus GII/Hu/JP/2007/GI LP15_GII.15/Sapporo/HK299 | Sapporo/HK299                            | Homo sapiens                                  | NA    | Pisoniviricetes | Picornavirales | Caliciviridae   | Vertebrates   |
| NC_044046 | Norovirus GII/Hu/JP/2011/GI I/Yuzawa/Gira2HS          | Yuzawa/Gira2HS                           | Homo sapiens                                  | NA    | Pisoniviricetes | Picornavirales | Caliciviridae   | Vertebrates   |
| NC_029645 | Norovirus GIII                                        | Norovirus Bo/GIII.2/Adam/2006/No         | bovine                                        | NA    | Pisoniviricetes | Picornavirales | Caliciviridae   | Vertebrates   |
| NC_045762 | Norovirus GIV                                         | CU081210E/USA/2010                       | Felis catus                                   | NA    | Pisoniviricetes | Picornavirales | Caliciviridae   | Vertebrates   |
| NC_044855 | Norovirus GIV                                         | Hu/US/2016/GIV.NA1[PNA1]/WI7002          | Homo sapiens                                  | NA    | Pisoniviricetes | Picornavirales | Caliciviridae   | Vertebrates   |
| NC_029647 | Norovirus GIV                                         | Hu/GIV.1/LakeMacquarie/NSW268O/2010/AU   | Homo sapiens                                  | NA    | Pisoniviricetes | Picornavirales | Caliciviridae   | Vertebrates   |
| NC_008311 | Norovirus GV                                          | Mu/NoV/GV/MNV1/2002/USA                  | NA                                            | NA    | Pisoniviricetes | Picornavirales | Caliciviridae   | Vertebrates   |
| NC_025675 | hunnivirus A4                                         | NrHuV/NYC-E21                            | Rattus norvegicus                             | NA    | Pisoniviricetes | Picornavirales | Picornaviridae  | Vertebrates   |
| NC_020901 | Alphamesonivirus 4                                    | F24/CI/2004                              | Culex nebulosus                               | NA    | Pisoniviricetes | Nidovirales    | Mesnidovirineae | Invertebrates |
| NC_030651 | Nylanderia fulva virus 1                              | Florida initial                          | Nylanderia fulva                              | NA    | Pisoniviricetes | Picornavirales | Soliniviridae   | Invertebrates |
| NC_004016 | Oat mosaic virus                                      | Cranbrook:laboratory isolate             | oats                                          | RNA 1 | Stelpaviricetes | Patatavirales  | Potyviridae     | Plants        |
| NC_004017 | Oat mosaic virus                                      | Cranbrook:laboratory isolate             | oats                                          | RNA 2 | Stelpaviricetes | Patatavirales  | Potyviridae     | Plants        |
| NC_005136 | Oat necrotic mottle virus                             | Type-NE                                  | NA                                            | NA    | Stelpaviricetes | Patatavirales  | Potyviridae     | Plants        |
| NC_043489 | Ofaie virus                                           | BrMS-MQ10                                | Mansonia sp.                                  | NA    | Pisoniviricetes | Nidovirales    | Mesnidovirineae | Invertebrates |
| NC_038863 | Olive latent ringspot virus                           | Olive                                    | Olive                                         | NA    | Pisoniviricetes | Picornavirales | Secoviridae     | Plants        |
| NC_035127 | Olivier's shrew virus 1                               | Gkd-1                                    | Crocidura oliveri guineensis                  | NA    | Pisoniviricetes | Nidovirales    | Arnidovirineae  | Vertebrates   |
| NC_027917 | Opsiphanes invirae iflavirus 1                        | Brazilian/2012                           | Opsiphanes invirae (Lepidoptera: Nymphalidae) | NA    | Pisoniviricetes | Picornavirales | Iflaviridae     | Invertebrates |
| NC_019409 | Ornithogalum mosaic virus                             | KP                                       | NA                                            | NA    | Stelpaviricetes | Patatavirales  | Potyviridae     | Plants        |
| NC_002469 | Mamastrovirus 13                                      | 2                                        | sheep                                         | NA    | Stelpaviricetes | Stellavirales  | Astroviridae    | Vertebrates   |
| NC_014252 | Panax virus Y                                         | 2                                        | Panax notoginseng                             | NA    | Stelpaviricetes | Patatavirales  | Potyviridae     | Plants        |
| NC_005028 | Papaya leaf distortion mosaic virus                   | NA                                       | NA                                            | NA    | Stelpaviricetes | Patatavirales  | Potyviridae     | Plants        |
| NC_018449 | Papaya lethal yellowing virus                         | 26                                       | Carica papaya                                 | NA    | Pisoniviricetes | Sobelivirales  | Solemoviridae   | Plants        |
| NC_001785 | Papaya ringspot virus                                 | NA                                       | NA                                            | NA    | Stelpaviricetes | Patatavirales  | Potyviridae     | Plants        |
| NC_043532 | Paris mosaic necrosis virus                           | PMNV-cn                                  | Daiswa polyphylla                             | NA    | Stelpaviricetes | Patatavirales  | Potyviridae     | Plants        |
| NC_055600 | Paris virus 1                                         | KM                                       | Paris polyphylla var. yunnanensis             | NA    | Stelpaviricetes | Patatavirales  | Potyviridae     | Plants        |

|           |                                                 |                         |                                                         |       |                 |                 |                    |               |
|-----------|-------------------------------------------------|-------------------------|---------------------------------------------------------|-------|-----------------|-----------------|--------------------|---------------|
| NC_003628 | Parsnip yellow fleck virus                      | P121                    | NA                                                      | NA    | Pisoniviricetes | Picornavirales  | Secoviridae        | Plants        |
| NC_036588 | Passerivirus sp.                                | waxbill/DB01/HU N/2014  | Uraeginthus granatina                                   | NA    | Pisoniviricetes | Picornavirales  | Picornaviridae     | Vertebrates   |
| NC_055497 | Passiflora edulis symptomless virus             | PESV-Rehovot            | Passiflora edulis f. edulis Sims cultivar Passion Dream | NA    | Stelpaviricetes | Patatavirales   | Potyviridae        | Plants        |
| NC_014790 | Passion fruit woodiness virus                   | PWV-MU2                 | Passiflora caerulea                                     | NA    | Stelpaviricetes | Patatavirales   | Potyviridae        | Plants        |
| NC_003629 | Pea enation mosaic virus 1                      | WSG                     | NA                                                      | NA    | Pisoniviricetes | Sobelivirales   | Solemoviridae      | Plants        |
| NC_001671 | Pea seed-borne mosaic virus                     | DPD1                    | NA                                                      | NA    | Stelpaviricetes | Patatavirales   | Potyviridae        | Plants        |
| NC_034214 | Peach rosette mosaic virus                      | PRMV2                   | grape                                                   | RNA 1 | Pisoniviricetes | Picornavirales  | Secoviridae        | Plants        |
| NC_034215 | Peach rosette mosaic virus                      | PRMV2                   | grape                                                   | RNA 2 | Pisoniviricetes | Picornavirales  | Secoviridae        | Plants        |
| NC_002600 | Peanut mottle virus                             | NA                      | NA                                                      | NA    | Stelpaviricetes | Patatavirales   | Potyviridae        | Plants        |
| NC_027124 | Pebjah virus                                    | I621                    | rhesus macaque                                          | NA    | Pisoniviricetes | Nidovirales     | Arnidovirineae     | Vertebrates   |
| NC_030293 | Pecan mosaic-associated virus                   | LA                      | Carya illinoensis                                       | NA    | Stelpaviricetes | Patatavirales   | Potyviridae        | Plants        |
| NC_040673 | Pemovirus B1                                    | CNSR2011                | Pelodiscus sinensis                                     | NA    | Pisoniviricetes | Picornavirales  | Picornaviridae     | Vertebrates   |
| NC_039004 | Penguin megirivirus                             | KGI-Bel-P5/2015         | Pygoscelis adeliae                                      | NA    | Pisoniviricetes | Picornavirales  | Picornaviridae     | Vertebrates   |
| NC_028468 | Penicillium aurantiogriseum foetidus-like virus | NA                      | Penicillium aurantiogriseum isolate MUT4330-b           | NA    | Yadokarivirales | Yadokariviridae | Alphayadokarivirus | Fungi         |
| NC_007147 | Pennisetum mosaic virus                         | B                       | NA                                                      | NA    | Stelpaviricetes | Patatavirales   | Potyviridae        | Plants        |
| NC_030225 | Pepo aphid-borne yellows virus                  | RSA BB Marrow           | Cucurbita pepo L. (marrow)                              | NA    | Pisoniviricetes | Sobelivirales   | Solemoviridae      | Plants        |
| NC_037052 | Pepper enamovirus                               | R1                      | Capsicum sp.                                            | NA    | Pisoniviricetes | Sobelivirales   | Solemoviridae      | Plants        |
| NC_001517 | Pepper mottle virus                             | NA                      | NA                                                      | NA    | Stelpaviricetes | Patatavirales   | Potyviridae        | Plants        |
| NC_008393 | Pepper severe mosaic virus                      | NA                      | NA                                                      | NA    | Stelpaviricetes | Patatavirales   | Potyviridae        | Plants        |
| NC_055129 | Pepper vein yellows virus 2                     | Is                      | Capsicum annuum                                         | NA    | Pisoniviricetes | Sobelivirales   | Solemoviridae      | Plants        |
| NC_036803 | Pepper vein yellows virus 5                     | Spain-Almeria 2-2013    | Capsicum annuum cv. California Wonder                   | NA    | Pisoniviricetes | Sobelivirales   | Solemoviridae      | Plants        |
| NC_015050 | Pepper vein yellows virus                       | NA                      | Capsicum annuum L. Var. grossum Sendt.                  | NA    | Pisoniviricetes | Sobelivirales   | Solemoviridae      | Plants        |
| NC_011918 | Pepper veinal mottle virus                      | P                       | NA                                                      | NA    | Stelpaviricetes | Patatavirales   | Potyviridae        | Plants        |
| NC_014327 | Pepper yellow mosaic virus                      | Pi-15                   | Capsicum annuum cv. Magali                              | NA    | Stelpaviricetes | Patatavirales   | Potyviridae        | Plants        |
| NC_003113 | Perina nuda virus                               | NA                      | NA                                                      | NA    | Pisoniviricetes | Picornavirales  | Iflaviridae        | Invertebrates |
| NC_004573 | Peru tomato mosaic virus                        | PPK13                   | NA                                                      | NA    | Stelpaviricetes | Patatavirales   | Potyviridae        | Plants        |
| NC_033492 | Petunia chlorotic mottle virus                  | Brats01                 | Petunia x hybrida                                       | RNA 1 | Pisoniviricetes | Picornavirales  | Secoviridae        | Plants        |
| NC_033493 | Petunia chlorotic mottle virus                  | Brats01                 | Petunia x hybrida                                       | RNA 2 | Pisoniviricetes | Picornavirales  | Secoviridae        | Plants        |
| NC_028793 | Phasey bean mild yellows virus                  | NSWCP15                 | chickpea                                                | NA    | Pisoniviricetes | Sobelivirales   | Solemoviridae      | Plants        |
| NC_027818 | Phopivirus                                      | NewEngland_US A/2011    | Phoca vitulina                                          | NA    | Pisoniviricetes | Picornavirales  | Picornaviridae     | Vertebrates   |
| NC_055577 | Physalis rugose mosaic virus                    | Piracicaba              | Physalis peruviana                                      | NA    | Pisoniviricetes | Sobelivirales   | Solemoviridae      | Plants        |
| NC_034568 | Picornia-like virus AWando15                    | AWando15                | Haliotis discus hannai (Pacific abalone)                | NA    | Pisoniviricetes | Picornavirales  |                    | Invertebrates |
| NC_030697 | Picornavirales Bu-3                             | Bu-3                    | Sus scrofa domesticus                                   | NA    | Pisoniviricetes | Picornavirales  |                    | Vertebrates   |
| NC_030744 | Picornavirales Tottori-HG1                      | Tottori-HG1             | Sus scrofa domesticus                                   | NA    | Pisoniviricetes | Picornavirales  |                    | Vertebrates   |
| NC_038989 | Picornaviridae sp. rodent/Ee/PicoV/ NX2015      | rodent/Ee/PicoV/ NX2015 | rodent                                                  | NA    | Pisoniviricetes | Picornavirales  | Picornaviridae     | Vertebrates   |
| NC_038957 | pigeon mesivirus 1                              | HK21                    | pigeon                                                  | NA    | Pisoniviricetes | Picornavirales  | Picornaviridae     | Vertebrates   |
| NC_015626 | Pigeon picornavirus B                           | 03/641                  | Feral pigeon                                            | NA    | Pisoniviricetes | Picornavirales  | Picornaviridae     | Unknown       |
| NC_009020 | Pipistrellus bat coronavirus HKU5               | HKU5-1 LMH03f           | bat                                                     | NA    | Pisoniviricetes | Nidovirales     | Cornidovirineae    | Vertebrates   |
| NC_034217 | Pityohyphantes rubrofasciatus iflavivirus       | UW1                     | Pityohyphantes rubrofasciatus                           | NA    | Pisoniviricetes | Picornavirales  | Iflaviridae        | Invertebrates |
| NC_055503 | Platycodon mild mottle virus                    | Okcheon                 | Platycodon grandiflorus                                 | NA    | Stelpaviricetes | Patatavirales   | Potyviridae        | Plants        |
| NC_003779 | Plautia stali intestine virus                   | NA                      | Plautia stali                                           | NA    | Pisoniviricetes | Picornavirales  | Dicistroviridae    | Invertebrates |
| NC_040650 | Pleione flower breaking virus                   | CZ-Wharf1               | Pleione humilis                                         | NA    | Stelpaviricetes | Patatavirales   | Potyviridae        | Plants        |
| NC_001445 | Plum pox virus                                  | PPV-NAT                 | NA                                                      | NA    | Stelpaviricetes | Patatavirales   | Potyviridae        | Plants        |

|           |                                                       |                            |                                    |       |                 |                |                 |               |
|-----------|-------------------------------------------------------|----------------------------|------------------------------------|-------|-----------------|----------------|-----------------|---------------|
| NC_055108 | Poecivirus BCCH-449                                   | BCCH-449                   | Black-capped chickadee             | NA    | Pisoniviricetes | Picornavirales | Picornaviridae  | Vertebrates   |
| NC_011543 | Poinsettia latent virus                               | NA                         | Euphorbia pulcherrima cv. Angelika | NA    | Pisoniviricetes | Sobelivirales  | Solemoviridae   | Plants        |
| NC_018872 | Pokeweed mosaic virus                                 | PkMV-PA                    | Phytolacca americana L.            | NA    | Stelpaviricetes | Patatavirales  | Potyviridae     | Plants        |
| NC_002058 | Enterovirus C                                         | Human poliovirus 1 Mahoney | NA                                 | NA    | Pisoniviricetes | Picornavirales | Picornaviridae  | Vertebrates   |
| NC_038319 | Human parechovirus 1                                  | NA                         | NA                                 | NA    | Pisoniviricetes | Picornavirales | Picornaviridae  | Vertebrates   |
| NC_023674 | Porcine astrovirus 2                                  | 43/USA                     | Sus scrofa                         | NA    | Stelpaviricetes | Stellavirales  | Astroviridae    | Vertebrates   |
| NC_019494 | Porcine astrovirus 3                                  | US-MO123                   | Sus scrofa (swine)                 | NA    | Stelpaviricetes | Stellavirales  | Astroviridae    | Vertebrates   |
| NC_023675 | Porcine astrovirus 4                                  | 35/USA                     | Sus scrofa                         | NA    | Stelpaviricetes | Stellavirales  | Astroviridae    | Vertebrates   |
| NC_023636 | Porcine astrovirus 5                                  | AstV5-US-IA122             | Sus scrofa (swine)                 | NA    | Stelpaviricetes | Stellavirales  | Astroviridae    | Vertebrates   |
| NC_039208 | Porcine coronavirus HKU15                             | HKU15-155                  | pig                                | NA    | Pisoniviricetes | Nidovirales    | Cornidovirineae | Vertebrates   |
| NC_004441 | Porcine enterovirus 9                                 | UKG/410/73                 | NA                                 | NA    | Pisoniviricetes | Picornavirales | Picornaviridae  | Vertebrates   |
| NC_003436 | Porcine epidemic diarrhoea virus                      | CV777                      | NA                                 | NA    | Pisoniviricetes | Nidovirales    | Cornidovirineae | Vertebrates   |
| NC_027054 | Porcine kobuvirus                                     | JS-02a-CHN/2014/China      | asymptomatic piglets               | NA    | Pisoniviricetes | Picornavirales | Picornaviridae  | Vertebrates   |
| NC_016769 | Porcine kobuvirus SH-W-CHN/2010/China                 | SH-W-CHN/2010/China        | pig                                | NA    | Pisoniviricetes | Picornavirales | Picornaviridae  | Vertebrates   |
| NC_011829 | Porcine kobuvirus swine/S-1-HUN/2007/Hungary          | swine/S-1-HUN/2007/Hungary | Sus scrofa (domestic pig)          | NA    | Pisoniviricetes | Picornavirales | Picornaviridae  | Vertebrates   |
| NC_038291 | Porcine reproductive and respiratory syndrome virus 2 | ATCC VR-2332               | Sus scrofa                         | NA    | Pisoniviricetes | Nidovirales    | Arnidovirineae  | Vertebrates   |
| NC_001961 | Porcine reproductive and respiratory syndrome virus   | NA                         | NA                                 | NA    | Pisoniviricetes | Nidovirales    | Arnidovirineae  | Vertebrates   |
| NC_003987 | Porcine sapelovirus 1                                 | VI3                        | NA                                 | NA    | Pisoniviricetes | Picornavirales | Picornaviridae  | Vertebrates   |
| NC_003985 | Teschovirus A                                         | F65                        | NA                                 | NA    | Pisoniviricetes | Picornavirales | Picornaviridae  | Vertebrates   |
| NC_022787 | Porcine torovirus                                     | SHI                        | porcine                            | NA    | Pisoniviricetes | Nidovirales    | Tornidovirineae | Vertebrates   |
| NC_023637 | Posavirus 1                                           | NA                         | Sus scrofa                         | NA    | Pisoniviricetes | Picornavirales | Posavirus       | Unknown       |
| NC_023638 | Posavirus 2                                           | NA                         | Sus scrofa                         | NA    | Pisoniviricetes | Picornavirales | Posavirus       | Unknown       |
| NC_028240 | Posavirus 3                                           | 958-4                      | swine                              | NA    | Pisoniviricetes | Picornavirales | Posavirus       | Unknown       |
| NC_008714 | enterovirus F4                                        | W1                         | NA                                 | NA    | Pisoniviricetes | Picornavirales | Picornaviridae  | Vertebrates   |
| NC_022798 | Potato black ringspot virus                           | PRI-Ec                     | Solanum tuberosum                  | RNA 1 | Pisoniviricetes | Picornavirales | Secoviridae     | Plants        |
| NC_001747 | Potato leafroll virus                                 | NA                         | NA                                 | NA    | Pisoniviricetes | Sobelivirales  | Solemoviridae   | Plants        |
| NC_004039 | Potato virus A                                        | infectious cDNA clone      | potato (Solanum tuberosum)         | NA    | Stelpaviricetes | Patatavirales  | Potyviridae     | Plants        |
| NC_043447 | Potato virus B                                        | Pasco-01                   | potato                             | RNA1  | Pisoniviricetes | Picornavirales | Secoviridae     | Plants        |
| NC_040417 | Potato virus U                                        | UC                         | Solanum tuberosum ssp. andigena    | RNA 1 | Pisoniviricetes | Picornavirales | Secoviridae     | Plants        |
| NC_040416 | Potato virus U                                        | UC                         | Solanum tuberosum ssp. andigena    | RNA 2 | Pisoniviricetes | Picornavirales | Secoviridae     | Plants        |
| NC_004010 | Potato virus V                                        | DV 42                      | NA                                 | NA    | Stelpaviricetes | Patatavirales  | Potyviridae     | Plants        |
| NC_001616 | Potato virus Y                                        | NA                         | NA                                 | NA    | Stelpaviricetes | Patatavirales  | Potyviridae     | Plants        |
| NC_031324 | Primate norovirus                                     | SimianNoV-nj               | NA                                 | NA    | Pisoniviricetes | Picornavirales | Caliciviridae   | Vertebrates   |
| NC_039078 | Prunus virus F                                        | 8816-s1                    | sweet cherry                       | RNA2  | Pisoniviricetes | Picornavirales | Secoviridae     | Plants        |
| NC_039077 | Prunus virus F                                        | 8816-v1                    | sweet cherry                       | RNA1  | Pisoniviricetes | Picornavirales | Secoviridae     | Plants        |
| NC_040724 | Psammotettix alienus iflavivirus 1                    | NA                         | Psammotettix alienus               | NA    | Pisoniviricetes | Picornavirales | Iflaviridae     | Invertebrates |
| NC_055513 | Pumpkin polerovirus                                   | PuPV                       | Pumpkin sp.                        | NA    | Pisoniviricetes | Sobelivirales  | Solemoviridae   | Plants        |
| NC_033792 | Qinghai Himalayan marmot astrovirus 1                 | HHMAstV1                   | Marmota himalayana                 | NA    | Stelpaviricetes | Stellavirales  | Astroviridae    | Vertebrates   |
| NC_033821 | Qinghai Himalayan marmot astrovirus 2                 | HHMAstV2                   | Marmota himalayana                 | NA    | Stelpaviricetes | Stellavirales  | Astroviridae    | Vertebrates   |
| NC_016403 | Quail picornavirus QPV1/HUN/2010                      | QPV1/HUN/2010              | Coturnix coturnix (quail)          | NA    | Pisoniviricetes | Picornavirales | Picornaviridae  | Vertebrates   |
| NC_025346 | Rabbit astrovirus TN/2208/2010                        | TN rabbit 10-2208          | Oryctolagus cuniculus              | NA    | Stelpaviricetes | Stellavirales  | Astroviridae    | Vertebrates   |
| NC_011704 | Rabbit calicivirus Australia 1 MIC-07                 | MIC-07                     | rabbit                             | NA    | Pisoniviricetes | Picornavirales | Caliciviridae   | Vertebrates   |
| NC_017083 | Rabbit coronavirus HKU14                              | HKU14-1                    | Oryctolagus cuniculus              | NA    | Pisoniviricetes | Nidovirales    | Cornidovirineae | Vertebrates   |
| NC_001543 | Rabbit hemorrhagic disease virus                      | FRG                        | NA                                 | NA    | Pisoniviricetes | Picornavirales | Caliciviridae   | Vertebrates   |

|           |                                         |                            |                                                        |       |                 |                |                 |               |
|-----------|-----------------------------------------|----------------------------|--------------------------------------------------------|-------|-----------------|----------------|-----------------|---------------|
| NC_026314 | rabbit kobuvirus                        | Berlin/Jan2011/0572        | Rattus norvegicus                                      | NA    | Pisoniviricetes | Picornavirales | Picornaviridae  | Vertebrates   |
| NC_039211 | Rabbit picornavirus                     | Ny4H/2010/HUN              | Oryctolagus cuniculus var. domestica (domestic rabbit) | NA    | Pisoniviricetes | Picornavirales | Picornaviridae  | Vertebrates   |
| NC_008580 | Rabbit vesivirus                        | NA                         | Oryctolagus cuniculus rodent                           | NA    | Pisoniviricetes | Picornavirales | Caliciviridae   | Vertebrates   |
| NC_055156 | Rabovirus B1                            | RtMp-PicoV/YN2014          |                                                        | NA    | Pisoniviricetes | Picornavirales | Picornaviridae  | Vertebrates   |
| NC_055160 | Rabovirus D1                            | MPV/NYC/2014/M005/0074     | Mus musculus                                           | NA    | Pisoniviricetes | Picornavirales | Picornaviridae  | Vertebrates   |
| NC_010709 | Radish mosaic virus                     | Japanese                   | NA                                                     | RNA 1 | Pisoniviricetes | Picornavirales | Secoviridae     | Plants        |
| NC_010710 | Radish mosaic virus                     | Japanese                   | NA                                                     | RNA 2 | Pisoniviricetes | Picornavirales | Secoviridae     | Plants        |
| NC_005267 | Raspberry ringspot virus                | cherry                     | grapevine                                              | RNA 2 | Pisoniviricetes | Picornavirales | Secoviridae     | Plants        |
| NC_005266 | Raspberry ringspot virus                | cherry                     | grapevine                                              | RNA 1 | Pisoniviricetes | Picornavirales | Secoviridae     | Plants        |
| NC_028963 | Rat arterivirus 1                       | Jilin2014                  | Myodes rufocanus                                       | NA    | Pisoniviricetes | Nidovirales    | Arnidovirineae  | Vertebrates   |
| NC_032987 | Rat arterivirus 1                       | Ningxia2015                | Cricetulus longicaudatus rat                           | NA    | Pisoniviricetes | Nidovirales    | Arnidovirineae  | Vertebrates   |
| NC_012936 | Rat coronavirus Parker                  | Parker                     |                                                        | NA    | Pisoniviricetes | Nidovirales    | Cornidovirineae | Vertebrates   |
| NC_003741 | Red clover mottle virus                 | S                          | NA                                                     | RNA 1 | Pisoniviricetes | Picornavirales | Secoviridae     | Plants        |
| NC_003738 | Red clover mottle virus                 | NA                         | NA                                                     | RNA 2 | Pisoniviricetes | Picornavirales | Secoviridae     | Plants        |
| NC_040399 | Red clover nepovirus A                  | B46                        | Trifolium pratense L.                                  | RNA 1 | Pisoniviricetes | Picornavirales | Secoviridae     | Plants        |
| NC_040400 | Red clover nepovirus A                  | B46                        | Trifolium pratense L.                                  | RNA 2 | Pisoniviricetes | Picornavirales | Secoviridae     | Plants        |
| NC_035461 | Reed chlorotic stripe virus             | Tianshui                   | common reed                                            | NA    | Stelpaviricetes | Patatavirales  | Potyviridae     | Plants        |
| NC_040642 | Rhinovirus A                            | AU1                        | Rhinella marina                                        | NA    | Pisoniviricetes | Picornavirales | Picornaviridae  | Vertebrates   |
| NC_009988 | Rhinolophus bat coronavirus HKU2        | HKU2/GD/430/2006           | NA                                                     | NA    | Pisoniviricetes | Nidovirales    | Cornidovirineae | Vertebrates   |
| NC_001490 | rhinovirus B14                          | NA                         | NA                                                     | NA    | Pisoniviricetes | Picornavirales | Picornaviridae  | Vertebrates   |
| NC_018613 | Rhizosolenia setigera RNA virus 01      | RsRNAV06                   | NA                                                     | NA    | Pisoniviricetes | Picornavirales | Marnaviridae    | Chromista     |
| NC_001874 | Rhopalosiphum padi virus                | NA                         | NA                                                     | NA    | Pisoniviricetes | Picornavirales | Dicistroviridae | Invertebrates |
| NC_028144 | Rice necrosis mosaic virus              | NA                         | Oryza sativa                                           | RNA 1 | Stelpaviricetes | Patatavirales  | Potyviridae     | Plants        |
| NC_028145 | Rice necrosis mosaic virus              | Ka-1                       | Oryza sativa                                           | RNA 2 | Stelpaviricetes | Patatavirales  | Potyviridae     | Plants        |
| NC_001632 | Rice tungro spherical virus             | NA                         | NA                                                     | NA    | Pisoniviricetes | Picornavirales | Secoviridae     | Plants        |
| NC_001575 | Rice yellow mottle virus                | C14                        | NA                                                     | NA    | Pisoniviricetes | Sobelivirales  | Solemoviridae   | Plants        |
| NC_031750 | Riptortus pedestris virus-1             | 1                          | Riptortus pedestris                                    | NA    | Pisoniviricetes | Picornavirales |                 | Invertebrates |
| NC_048210 | Rodent arterivirus                      | RtEi-Arterivirus/SX2014    | Eothenomys inez                                        | NA    | Pisoniviricetes | Nidovirales    | Arnidovirineae  | Vertebrates   |
| NC_040535 | Rodent arterivirus                      | RtMc-Arterivirus/Tibet2014 | Neodon clarkei                                         | NA    | Pisoniviricetes | Nidovirales    | Arnidovirineae  | Vertebrates   |
| NC_036583 | Rodent astrovirus                       | GX-006                     | Rattus norvegicus                                      | NA    | Stelpaviricetes | Stellavirales  | Astroviridae    | Vertebrates   |
| NC_046954 | Rodent coronavirus                      | RtMruf-CoV-2/JL2014        | Myodes rufocanus                                       | NA    | Pisoniviricetes | Nidovirales    | Cornidovirineae | Vertebrates   |
| NC_038314 | Rodent hepatovirus CTV459Lopsik2004     | CIV459Lopsik2004           | Lophuromys sikapusi                                    | NA    | Pisoniviricetes | Picornavirales | Picornaviridae  | Vertebrates   |
| NC_038315 | Rodent hepatovirus KEF121Sigmas2012     | KEF121Sigmas2012           | Sigmodon mascotensis                                   | NA    | Pisoniviricetes | Picornavirales | Picornaviridae  | Vertebrates   |
| NC_028363 | Rodent hepatovirus RMU101637Micar v2010 | RMU101637Micar v2010       | Microtus arvalis                                       | NA    | Pisoniviricetes | Picornavirales | Picornaviridae  | Vertebrates   |
| NC_024070 | Rosavirus A2                            | GA7403                     | Homo sapiens                                           | NA    | Pisoniviricetes | Picornavirales | Picornaviridae  | Vertebrates   |
| NC_031105 | Rosavirus B                             | RNCW0602091R               | Rattus norvegicus                                      | NA    | Pisoniviricetes | Picornavirales | Picornaviridae  | Vertebrates   |
| NC_031106 | Rosavirus C                             | RATLC11A                   | Rattus andamanensis                                    | NA    | Pisoniviricetes | Picornavirales | Picornaviridae  | Vertebrates   |
| NC_038880 | Rosavirus M-7                           | Rosa.M-7                   | Peromyscus crinitus                                    | NA    | Pisoniviricetes | Picornavirales | Picornaviridae  | Vertebrates   |
| NC_019031 | Rose yellow mosaic virus                | Minnesota                  | Rosa hybrid cultivar cv. Ballerina                     | NA    | Stelpaviricetes | Patatavirales  | Potyviridae     | Plants        |
| NC_027198 | Rottboellia yellow mottle virus         | NA                         | NA                                                     | NA    | Pisoniviricetes | Sobelivirales  | Solemoviridae   | Plants        |
| NC_018871 | Rousettus bat coronavirus HKU10         | 183A                       | bat                                                    | NA    | Pisoniviricetes | Nidovirales    | Cornidovirineae | Vertebrates   |
| NC_009021 | Rousettus bat coronavirus HKU9          | HKU9-1 BF_005I             | bat                                                    | NA    | Pisoniviricetes | Nidovirales    | Cornidovirineae | Vertebrates   |

|           |                                                 |                              |                                            |       |                 |                |                 |               |
|-----------|-------------------------------------------------|------------------------------|--------------------------------------------|-------|-----------------|----------------|-----------------|---------------|
| NC_030886 | Rousettus bat coronavirus                       | GCCDC1 356                   | Rousettus leschenaulti                     | NA    | Pisoniviricetes | Nidovirales    | Cornidovirineae | Vertebrates   |
| NC_011187 | Sowbane mosaic virus                            | NA                           | Rubus sp.                                  | NA    | Pisoniviricetes | Sobelivirales  | Solemoviridae   | Plants        |
| NC_001814 | Ryegrass mosaic virus                           | NA                           | NA                                         | NA    | Stelpaviricetes | Patatavirales  | Potyviridae     | Plants        |
| NC_003747 | Ryegrass mottle virus                           | MAFF. No. 307043             | NA                                         | NA    | Pisoniviricetes | Sobelivirales  | Solemoviridae   | Plants        |
| NC_002066 | Sacbrood virus                                  | Rothamstead                  | NA                                         | NA    | Pisoniviricetes | Picornavirales | Iflaviridae     | Invertebrates |
| NC_009448 | Saffold virus                                   | NA                           | NA                                         | NA    | Pisoniviricetes | Picornavirales | Picornaviridae  | Vertebrates   |
| NC_036802 | Saffron latent virus                            | Ir-Kh1                       | Crocus sativus L.                          | NA    | Stelpaviricetes | Patatavirales  | Potyviridae     | Plants        |
| NC_012986 | Salivirus A                                     | 02394-01                     | Homo sapiens                               | NA    | Pisoniviricetes | Picornavirales | Picornaviridae  | Vertebrates   |
| NC_025114 | Salivirus FHB                                   | SaliV-FHB                    | Homo sapiens; child                        | NA    | Pisoniviricetes | Picornavirales | Picornaviridae  | Vertebrates   |
| NC_012957 | Salivirus NG-J1                                 | NG-J1                        | Homo sapiens                               | NA    | Pisoniviricetes | Picornavirales | Picornaviridae  | Vertebrates   |
| NC_025676 | San Miguel sea lion virus 8                     | NA                           | NA                                         | NA    | Pisoniviricetes | Picornavirales | Caliciviridae   | Vertebrates   |
| NC_006554 | Sapovirus C12                                   | C12                          | NA                                         | NA    | Pisoniviricetes | Picornavirales | Caliciviridae   | Vertebrates   |
| NC_006269 | Sapovirus Hu/Dresden/pJG-Sap01/DE               | Hu/Dresden/pJG-Sap01/DE      | NA                                         | NA    | Pisoniviricetes | Picornavirales | Caliciviridae   | Vertebrates   |
| NC_027026 | Sapovirus Hu/Nagoya/NGY-1/2012/JPN              | Hu/SaV/Nagoya/NGY-1/2012/JPN | NA                                         | NA    | Pisoniviricetes | Picornavirales | Caliciviridae   | Vertebrates   |
| NC_010624 | Sapovirus Mc10                                  | Mc10                         | NA                                         | NA    | Pisoniviricetes | Picornavirales | Caliciviridae   | Vertebrates   |
| NC_004718 | SARS coronavirus Tor2                           | Tor2                         | Homo sapiens                               | NA    | Pisoniviricetes | Nidovirales    | Cornidovirineae | Vertebrates   |
| NC_003785 | Satsuma dwarf virus                             | S-58                         | NA                                         | RNA 1 | Pisoniviricetes | Picornavirales | Secoviridae     | Plants        |
| NC_003786 | Satsuma dwarf virus                             | S-58                         | NA                                         | RNA 2 | Pisoniviricetes | Picornavirales | Secoviridae     | Plants        |
| NC_025837 | Sauropus yellowing virus                        | THSP1-B                      | Sauropus androgynus                        | NA    | Pisoniviricetes | Sobelivirales  | Solemoviridae   | Plants        |
| NC_003399 | Scallion mosaic virus                           | NA                           | Allium chinense                            | NA    | Stelpaviricetes | Patatavirales  | Potyviridae     | Plants        |
| NC_007522 | Aurantiochytrium single-stranded RNA virus 01   | NA                           | NA                                         | NA    | Pisoniviricetes | Picornavirales | Marnaviridae    | Chromista     |
| NC_009657 | Scotophilus bat coronavirus 512                 | BtCoV/512/2005               | NA                                         | NA    | Pisoniviricetes | Nidovirales    | Cornidovirineae | Vertebrates   |
| NC_009891 | Seal picornavirus type 1                        | HO.02.21                     | Phoca hispida                              | NA    | Pisoniviricetes | Picornavirales | Picornaviridae  | Vertebrates   |
| NC_021482 | Seboko virus 1                                  | 1                            | Hylomyscus                                 | NA    | Pisoniviricetes | Picornavirales | Picornaviridae  | Vertebrates   |
| NC_011349 | Senecavirus A                                   | SVV-001                      | NA                                         | NA    | Pisoniviricetes | Picornavirales | Picornaviridae  | Vertebrates   |
| NC_002568 | Sesbania mosaic virus                           | NA                           | NA                                         | NA    | Pisoniviricetes | Sobelivirales  | Solemoviridae   | Plants        |
| NC_045512 | Severe acute respiratory syndrome coronavirus 2 | Wuhan-Hu-1                   | Homo sapiens                               | NA    | Pisoniviricetes | Nidovirales    | Cornidovirineae | Vertebrates   |
| NC_007433 | Shallot yellow stripe virus                     | ZQ2                          | Allium fistulosum                          | NA    | Stelpaviricetes | Patatavirales  | Potyviridae     | Plants        |
| NC_038961 | Shanbavirus A                                   | BtMf-PicoV-1/SAX2011         | Miniopterus fuliginosus                    | NA    | Pisoniviricetes | Picornavirales | Picornaviridae  | Vertebrates   |
| NC_046955 | Shrew coronavirus                               | Shrew-CoV/Tibet2014          | Sorex araneus                              | NA    | Pisoniviricetes | Nidovirales    | Cornidovirineae | Vertebrates   |
| NC_028364 | Shrew hepatovirus KS121232Sorara2012            | KS121232Sorara2012           | Sorex araneus                              | NA    | Pisoniviricetes | Picornavirales | Picornaviridae  | Vertebrates   |
| NC_032978 | Shuangao insect virus 8                         | insectZJ96360                | insects                                    | NA    | Pisoniviricetes | Picornavirales | Polycipiviridae | Invertebrates |
| NC_037655 | Sichuan takin astrovirus                        | LLT03                        | Budorcas taxicolor tibetana                | NA    | Stelpaviricetes | Stellavirales  | Astroviridae    | Vertebrates   |
| NC_037654 | Sichuan takin enterovirus                       | LLT03                        | Budorcas taxicolor tibetana                | NA    | Pisoniviricetes | Picornavirales | Picornaviridae  | Vertebrates   |
| NC_023861 | Siccinivirus A                                  | UCC001                       | chicken                                    | NA    | Pisoniviricetes | Picornavirales | Picornaviridae  | Vertebrates   |
| NC_028380 | siccinivirus A1                                 | JSY                          | chicken                                    | NA    | Pisoniviricetes | Picornavirales | Picornaviridae  | Vertebrates   |
| NC_003988 | Enterovirus H                                   | NA                           | NA                                         | NA    | Pisoniviricetes | Picornavirales | Picornaviridae  | Vertebrates   |
| NC_038309 | Simian enterovirus SV4                          | 1715 UWB                     | NA                                         | NA    | Pisoniviricetes | Picornavirales | Picornaviridae  | Vertebrates   |
| NC_038293 | Simian hemorrhagic encephalitis virus           | Sukhumi                      | Macaca mulatta                             | NA    | Pisoniviricetes | Nidovirales    | Arnidovirineae  | Vertebrates   |
| NC_003092 | Simian hemorrhagic fever virus                  | LVR 42-0/M6941               | NA                                         | NA    | Pisoniviricetes | Nidovirales    | Arnidovirineae  | Vertebrates   |
| NC_004451 | Simian sapelovirus 1                            | 2383                         | NA                                         | NA    | Pisoniviricetes | Picornavirales | Picornaviridae  | Vertebrates   |
| NC_014137 | Slow bee paralysis virus                        | Rothamsted                   | NA                                         | NA    | Pisoniviricetes | Picornavirales | Iflaviridae     | Invertebrates |
| NC_033706 | Solanum nodiflorum mottle virus                 | NA                           | Solanum nodiflorum                         | NA    | Pisoniviricetes | Sobelivirales  | Solemoviridae   | Plants        |
| NC_006559 | Solenopsis invicta virus 1                      | NA                           | Solenopsis invicta                         | NA    | Pisoniviricetes | Picornavirales | Dicistroviridae | Invertebrates |
| NC_039236 | Solenopsis invicta virus 2                      | Florida-Sin                  | Solenopsis invicta (ant)                   | NA    | Pisoniviricetes | Picornavirales | Polycipiviridae | Invertebrates |
| NC_012531 | Solenopsis invicta virus 3                      | DM                           | Solenopsis invicta (red imported fire ant) | NA    | Pisoniviricetes | Picornavirales | Soliniviridae   | Invertebrates |
| NC_035455 | Solenopsis invicta virus 4                      | Gainesville-Sin              | Solenopsis invicta (ant)                   | NA    | Pisoniviricetes | Picornavirales | Polycipiviridae | Invertebrates |

|           |                                       |                      |                                            |       |                 |                |                 |               |
|-----------|---------------------------------------|----------------------|--------------------------------------------|-------|-----------------|----------------|-----------------|---------------|
| NC_004035 | Sorghum mosaic virus                  | Xiaoshan             | sugarcane                                  | NA    | Stelpaviricetes | Patatavirales  | Potyviridae     | Plants        |
| NC_004060 | Southern bean mosaic virus            | Sao Paulo            | NA                                         | NA    | Pisoniviricetes | Sobelivirales  | Solemoviridae   | Plants        |
| NC_025113 | Southwest baboon virus 1              | SWBV_16986_11/4/2013 | Papio anubis                               | NA    | Pisoniviricetes | Nidovirales    | Arnidovirineae  | Vertebrates   |
| NC_032270 | Soybean latent spherical virus        | ND1                  | soybean                                    | RA11  | Pisoniviricetes | Picornavirales | Secoviridae     | Plants        |
| NC_032271 | Soybean latent spherical virus        | ND1                  | soybean                                    | RA22  | Pisoniviricetes | Picornavirales | Secoviridae     | Plants        |
| NC_002634 | Soybean mosaic virus                  | N                    | NA                                         | NA    | Stelpaviricetes | Patatavirales  | Potyviridae     | Plants        |
| NC_016033 | Soybean yellow common mosaic virus    | NA                   | Glycine max                                | NA    | Pisoniviricetes | Sobelivirales  | Solemoviridae   | Plants        |
| NC_016992 | Sparrow coronavirus HKU17             | HKU17-6124           | sparrow                                    | NA    | Pisoniviricetes | Nidovirales    | Cornidovirineae | Vertebrates   |
| NC_016405 | Spodoptera exigua iflavivirus 1       | NA                   | Spodoptera exigua                          | NA    | Pisoniviricetes | Picornavirales | Iflaviridae     | Invertebrates |
| NC_023676 | Spodoptera exigua iflavivirus 2       | Korean               | Spodoptera exigua                          | NA    | Pisoniviricetes | Picornavirales | Iflaviridae     | Invertebrates |
| NC_035221 | Squash chlorotic leaf spot virus      | Su12-10              | Cucurbita moschata (squash)                | RNA 1 | Pisoniviricetes | Picornavirales | Secoviridae     | Plants        |
| NC_035215 | Squash chlorotic leaf spot virus      | Su12-10              | Cucurbita moschata (squash)                | RNA 2 | Pisoniviricetes | Picornavirales | Secoviridae     | Plants        |
| NC_003799 | Squash mosaic virus                   | Y-SqMV               | NA                                         | RNA 1 | Pisoniviricetes | Picornavirales | Secoviridae     | Plants        |
| NC_003800 | Squash mosaic virus                   | Y-SqMV               | NA                                         | RNA 2 | Pisoniviricetes | Picornavirales | Secoviridae     | Plants        |
| NC_010521 | Squash vein yellowing virus           | Florida              | watermelon                                 | NA    | Stelpaviricetes | Patatavirales  | Potyviridae     | Plants        |
| NC_011050 | Steller sea lion vesivirus            | SSL2004-250F         | NA                                         | NA    | Pisoniviricetes | Picornavirales | Caliciviridae   | Vertebrates   |
| NC_006964 | Strawberry latent ringspot virus      | NCGR MEN 454.001     | NA                                         | RNA 1 | Pisoniviricetes | Picornavirales | Secoviridae     | Plants        |
| NC_003445 | Strawberry mottle virus               | NA                   | NA                                         | NA    | Pisoniviricetes | Picornavirales | Secoviridae     | Plants        |
| NC_018571 | Suakwa aphid-borne yellows virus      | SABYV-TW19           | Luffa cylindrica (Suakwa vegetable sponge) | NA    | Pisoniviricetes | Sobelivirales  | Solemoviridae   | Plants        |
| NC_004346 | Subterranean clover mottle virus      | p23                  | Trifolium subterraneum                     | NA    | Pisoniviricetes | Sobelivirales  | Solemoviridae   | Plants        |
| NC_035459 | Sudan watermelon mosaic virus         | Su94-54              | cucumis melo var. flexuosus                | NA    | Stelpaviricetes | Patatavirales  | Potyviridae     | Plants        |
| NC_003398 | Sugarcane mosaic virus                | NA                   | maize                                      | NA    | Stelpaviricetes | Patatavirales  | Potyviridae     | Plants        |
| NC_014037 | Sugarcane streak mosaic virus         | PAK                  | Saccharum hybrid                           | NA    | Stelpaviricetes | Patatavirales  | Potyviridae     | Plants        |
| NC_000874 | Sugarcane yellow leaf virus           | A                    | Saccharum sp. cultivar CP65-357            | NA    | Pisoniviricetes | Sobelivirales  | Solemoviridae   | Plants        |
| NC_014038 | Sunflower chlorotic mottle virus      | Common (C)           | Helianthus annuus                          | NA    | Stelpaviricetes | Patatavirales  | Potyviridae     | Plants        |
| NC_021065 | Sunflower mild mosaic virus           | Entre Rios           | Helianthus annuus (sunflower)              | NA    | Stelpaviricetes | Patatavirales  | Potyviridae     | Plants        |
| NC_034208 | Sunflower ring blotch virus           | Chaco                | Helianthus annuus                          | NA    | Stelpaviricetes | Patatavirales  | Potyviridae     | Plants        |
| NC_001841 | Sweet potato feathery mottle virus    | S                    | NA                                         | NA    | Stelpaviricetes | Patatavirales  | Potyviridae     | Plants        |
| NC_020896 | Sweet potato latent virus             | NA                   | Ipomoea batatas                            | NA    | Stelpaviricetes | Patatavirales  | Potyviridae     | Plants        |
| NC_038510 | Sweet potato leaf speckling virus     | Peruvian             | NA                                         | NA    | Pisoniviricetes | Sobelivirales  | Solemoviridae   | Plants        |
| NC_003797 | Sweet potato mild mottle virus        | NA                   | NA                                         | NA    | Stelpaviricetes | Patatavirales  | Potyviridae     | Plants        |
| NC_038563 | Sweet potato mild speckling virus     | NA                   | NA                                         | NA    | Stelpaviricetes | Patatavirales  | Potyviridae     | Plants        |
| NC_017970 | Sweet potato virus 2                  | GWB-2                | Ipomoea batatas cv. Beauregard             | NA    | Stelpaviricetes | Patatavirales  | Potyviridae     | Plants        |
| NC_014742 | Sweet potato virus C                  | C1                   | NA                                         | NA    | Stelpaviricetes | Patatavirales  | Potyviridae     | Plants        |
| NC_018093 | Sweet potato virus G                  | Jesus Maria          | Ipomoea batatas cv. Arapey                 | NA    | Stelpaviricetes | Patatavirales  | Potyviridae     | Plants        |
| NC_028806 | Swine enteric coronavirus             | Italy/213306/2009    | pig                                        | NA    | Pisoniviricetes | Nidovirales    | Cornidovirineae | Vertebrates   |
| NC_018226 | Pasivirus A1                          | NA                   | Sus scrofa                                 | NA    | Pisoniviricetes | Picornavirales | Picornaviridae  | Vertebrates   |
| NC_055159 | tottorivirus A1                       | Tottori-WOL          | Sus scrofa domesticus                      | NA    | Pisoniviricetes | Picornavirales | Picornaviridae  | Vertebrates   |
| NC_022745 | Tall oatgrass mosaic virus            | Benesov              | Arrhenatherum elatius                      | NA    | Stelpaviricetes | Patatavirales  | Potyviridae     | Plants        |
| NC_026615 | Tamarillo leaf malformation virus     | A                    | Solanum betaceum                           | NA    | Stelpaviricetes | Patatavirales  | Potyviridae     | Plants        |
| NC_003005 | Taura syndrome virus                  | NA                   | Penaeus vannamei                           | NA    | Pisoniviricetes | Picornavirales | Dicistroviridae | Invertebrates |
| NC_009742 | Telosma mosaic virus                  | Hanoi                | Telosma cordata (telosma)                  | NA    | Stelpaviricetes | Patatavirales  | Potyviridae     | Plants        |
| NC_026250 | Thaumetopoea pityocampa iflavivirus 1 | NA                   | Thaumetopoea pityocampa                    | NA    | Pisoniviricetes | Picornavirales | Iflaviridae     | Invertebrates |

|           |                                     |               |                                 |       |                 |                |                 |               |
|-----------|-------------------------------------|---------------|---------------------------------|-------|-----------------|----------------|-----------------|---------------|
| NC_001366 | Theilovirus                         | GDVII         | NA                              | NA    | Pisoniviricetes | Picornavirales | Picornaviridae  | Vertebrates   |
| NC_011549 | Thrush coronavirus HKU12-600        | NA            | grey-backed thrush              | NA    | Pisoniviricetes | Nidovirales    | Cornidovirineae | Vertebrates   |
| NC_007180 | Thunberg fritillary mosaic virus    | Ningbo        | Fritillaria thunbergii          | NA    | Stelpaviricetes | Patatavirales  | Potyviridae     | Plants        |
| NC_001555 | Tobacco etch virus                  | NA            | NA                              | NA    | Stelpaviricetes | Patatavirales  | Potyviridae     | Plants        |
| NC_030118 | Tobacco mosquado virus              | RS-01         | Nicotiana tabacum (tobacco)     | NA    | Stelpaviricetes | Patatavirales  | Potyviridae     | Plants        |
| NC_005097 | Tobacco ringspot virus              | Bud Blight    | NA                              | RNA 1 | Pisoniviricetes | Picornavirales | Secoviridae     | Plants        |
| NC_005096 | Tobacco ringspot virus              | NA            | NA                              | RNA 2 | Pisoniviricetes | Picornavirales | Secoviridae     | Plants        |
| NC_009994 | Tobacco vein banding mosaic virus   | YND           | tobacco                         | NA    | Stelpaviricetes | Patatavirales  | Potyviridae     | Plants        |
| NC_010732 | Tobacco vein distorting virus       | Longlin       | tobacco                         | NA    | Pisoniviricetes | Sobelivirales  | Solemoviridae   | Plants        |
| NC_001768 | Tobacco vein mottling virus         | NA            | NA                              | NA    | Stelpaviricetes | Patatavirales  | Potyviridae     | Plants        |
| NC_034265 | Tobacco virus 2                     | TV2           | Nicotiana tabacum               | NA    | Pisoniviricetes | Sobelivirales  | Solemoviridae   | Plants        |
| NC_004439 | Tomato black ring virus             | MJ            | NA                              | RNA 1 | Pisoniviricetes | Picornavirales | Secoviridae     | Plants        |
| NC_004440 | Tomato black ring virus             | MJ            | NA                              | RNA 2 | Pisoniviricetes | Picornavirales | Secoviridae     | Plants        |
| NC_013075 | Tomato chocolate spot virus         | NA            | tomato                          | RNA 1 | Pisoniviricetes | Picornavirales | Secoviridae     | Plants        |
| NC_013076 | Tomato chocolate spot virus         | NA            | tomato                          | RNA2  | Pisoniviricetes | Picornavirales | Secoviridae     | Plants        |
| NC_010987 | Tomato marchitez virus              | PRI-TMarV0601 | NA                              | RNA 1 | Pisoniviricetes | Picornavirales | Secoviridae     | Plants        |
| NC_010988 | Tomato marchitez virus              | PRI-TMarV0601 | NA                              | RNA 2 | Pisoniviricetes | Picornavirales | Secoviridae     | Plants        |
| NC_038920 | Tomato mild mottle virus            | NA            | NA                              | NA    | Stelpaviricetes | Patatavirales  | Potyviridae     | Plants        |
| NC_027926 | Tomato necrotic dwarf virus         | R             | Solanum lycopersicum (tomato)   | RNA1  | Pisoniviricetes | Picornavirales | Secoviridae     | Plants        |
| NC_027927 | Tomato necrotic dwarf virus         | R             | Solanum lycopersicum (tomato)   | RNA2  | Pisoniviricetes | Picornavirales | Secoviridae     | Plants        |
| NC_017824 | Tomato necrotic stunt virus         | MX9354        | Solanum lycopersicum (tomato)   | NA    | Stelpaviricetes | Patatavirales  | Potyviridae     | Plants        |
| NC_003840 | Tomato ringspot virus               | raspberry     | NA                              | RNA 1 | Pisoniviricetes | Picornavirales | Secoviridae     | Plants        |
| NC_003839 | Tomato ringspot virus               | NA            | NA                              | RNA 2 | Pisoniviricetes | Picornavirales | Secoviridae     | Plants        |
| NC_009032 | Tomato torrado virus                | PRI-ToTV0301  | NA                              | RNA 2 | Pisoniviricetes | Picornavirales | Secoviridae     | Plants        |
| NC_025890 | torchivirus A1                      | 44665         | Testudo hermanni                | NA    | Pisoniviricetes | Picornavirales | Picornaviridae  | Vertebrates   |
| NC_023988 | Tortoise rafivirus A                | UF4           | Indotestudo forsteni            | NA    | Pisoniviricetes | Picornavirales | Picornaviridae  | Vertebrates   |
| NC_038861 | Transmissible gastroenteritis virus | PUR46-MAD     | pig                             | NA    | Pisoniviricetes | Nidovirales    | Cornidovirineae | Vertebrates   |
| NC_003783 | Triatoma virus                      | NA            | Triatoma infestans              | NA    | Pisoniviricetes | Picornavirales | Dicistroviridae | Invertebrates |
| NC_012799 | Triticum mosaic virus               | U06-123       | Triticum aestivum cultivar RonL | NA    | Stelpaviricetes | Patatavirales  | Potyviridae     | Plants        |
| NC_043424 | Tuberose mild mottle virus          | Hangzhou      | NA                              | NA    | Stelpaviricetes | Patatavirales  | Potyviridae     | Plants        |
| NC_043512 | Tulane virus                        | NA            | NA                              | NA    | Pisoniviricetes | Picornavirales | Caliciviridae   | Vertebrates   |
| NC_028961 | Tupaia hepatitis A                  | TN1           | Tupaia belangeri chinensis      | NA    | Pisoniviricetes | Picornavirales | Picornaviridae  | Vertebrates   |
| NC_014411 | Passerivirus A1                     | 356           | Pale Thrush                     | NA    | Pisoniviricetes | Picornavirales | Picornaviridae  | Vertebrates   |
| NC_014412 | Oscivirus A1                        | 10717         | Oriental Magpie Robin           | NA    | Pisoniviricetes | Picornavirales | Picornaviridae  | Vertebrates   |
| NC_014413 | Oscivirus A2                        | 10878         | Grey-backed Thrush              | NA    | Pisoniviricetes | Picornavirales | Picornaviridae  | Vertebrates   |
| NC_005790 | Turkey astrovirus 2                 | NA            | NA                              | NA    | Stelpaviricetes | Stellavirales  | Astroviridae    | Vertebrates   |
| NC_002470 | Turkey astrovirus                   |               | turkey                          | NA    | Stelpaviricetes | Stellavirales  | Astroviridae    | Vertebrates   |
| NC_038304 | Turkey avisivirus                   | USA-IN1       | Meleagris gallopavo             | NA    | Pisoniviricetes | Picornavirales | Picornaviridae  | Vertebrates   |
| NC_043516 | Turkey calicivirus                  | L11043        | turkey                          | NA    | Pisoniviricetes | Picornavirales | Caliciviridae   | Vertebrates   |
| NC_010800 | Turkey coronavirus                  | MG10          | turkey                          | NA    | Pisoniviricetes | Nidovirales    | Cornidovirineae | Vertebrates   |
| NC_021201 | Turkey hepatitis virus 2993D        | 124           | turkey poult                    | NA    | Pisoniviricetes | Picornavirales | Picornaviridae  | Vertebrates   |
| NC_002509 | Turnip mosaic virus                 | NA            | NA                              | NA    | Stelpaviricetes | Patatavirales  | Potyviridae     | Plants        |
| NC_013218 | Turnip ringspot virus               | Toledo        | NA                              | RNA 1 | Pisoniviricetes | Picornavirales | Secoviridae     | Plants        |
| NC_013219 | Turnip ringspot virus               | Toledo        | NA                              | RNA 2 | Pisoniviricetes | Picornavirales | Secoviridae     | Plants        |
| NC_003743 | Turnip yellows virus                | FL1           | NA                              | NA    | Pisoniviricetes | Sobelivirales  | Solemoviridae   | Plants        |
| NC_009019 | Tylonycteris bat coronavirus HKU4   | HKU4-1 B04f   | bat                             | NA    | Pisoniviricetes | Nidovirales    | Cornidovirineae | Vertebrates   |

|           |                                         |              |                                                     |       |                 |                 |                    |               |
|-----------|-----------------------------------------|--------------|-----------------------------------------------------|-------|-----------------|-----------------|--------------------|---------------|
| NC_014791 | Ugandan cassava brown streak virus      | UG           | Manihot esculenta                                   | NA    | Stelpaviricetes | Patatavirales   | Potyviridae        | Plants        |
| NC_029992 | Free State vervet virus                 | VSAI1003     | Chlorocebus sp.                                     | NA    | Pisoniviricetes | Nidovirales     | Arnidovirineae     | Vertebrates   |
| NC_017977 | Cyrtanthus elatus virus A               | Marijiniup 7 | Cyrtanthus elatus                                   | NA    | Stelpaviricetes | Patatavirales   | Potyviridae        | Plants        |
| NC_025250 | Vanilla distortion mosaic virus         | VDMV-Cor     | Coriandrum sativum                                  | NA    | Stelpaviricetes | Patatavirales   | Potyviridae        | Plants        |
| NC_040601 | Varroa destructor virus 2               | VDV-2        | Varroa destructor (mite)                            | NA    | Pisoniviricetes | Picornavirales  | Iflaviridae        | Invertebrates |
| NC_006494 | Varroa destructor virus 1               | NA           | Varroa destructor mites                             | NA    | Pisoniviricetes | Picornavirales  | Iflaviridae        | Invertebrates |
| NC_014509 | Velvet tobacco mottle virus             | K1           | Nicotiana velutina                                  | NA    | Pisoniviricetes | Sobelivirales   | Solemoviridae      | Plants        |
| NC_010735 | Verbena virus Y                         | Michigan     | Verbena sp. cv. 'Taylor Town'                       | NA    | Stelpaviricetes | Patatavirales   | Potyviridae        | Plants        |
| NC_002551 | Vesicular exanthema of swine virus      | NA           | NA                                                  | NA    | Pisoniviricetes | Picornavirales  | Caliciviridae      | Vertebrates   |
| NC_027122 | Vesivirus ferret badger/JX12/China/2012 | FBCV-JX12    | ferret badger                                       | NA    | Pisoniviricetes | Picornavirales  | Caliciviridae      | Vertebrates   |
| NC_004541 | Walrus calicivirus                      | NA           | walrus                                              | NA    | Pisoniviricetes | Picornavirales  | Caliciviridae      | Vertebrates   |
| NC_030843 | Washington bat picornavirus             | UW1          | NA                                                  | NA    | Pisoniviricetes | Picornavirales  | Picornaviridae     | Invertebrates |
| NC_006262 | Watermelon mosaic virus                 | WMV-Fr       | NA                                                  | NA    | Stelpaviricetes | Patatavirales   | Potyviridae        | Plants        |
| NC_035191 | Wencheng Sm shrew coronavirus           | Xingguo-101  | Suncus murinus                                      | NA    | Pisoniviricetes | Nidovirales     | Cornidovirineae    | Vertebrates   |
| NC_009805 | Wheat eglid mosaic virus                | NA           | NA                                                  | NA    | Stelpaviricetes | Patatavirales   | Potyviridae        | Plants        |
| NC_035451 | Wheat leaf yellowing-associated virus   | JN-U3        | Triticum aestivum (wheat)                           | NA    | Pisoniviricetes | Sobelivirales   | Solemoviridae      | Plants        |
| NC_040508 | Wheat spindle streak mosaic virus       | WSSMV_South  | NA                                                  | RNA 1 | Stelpaviricetes | Patatavirales   | Potyviridae        | Plants        |
| NC_040507 | Wheat spindle streak mosaic virus       | WSSMV_South  | NA                                                  | RNA 2 | Stelpaviricetes | Patatavirales   | Potyviridae        | Plants        |
| NC_001886 | Wheat streak mosaic virus               | NA           | NA                                                  | NA    | Stelpaviricetes | Patatavirales   | Potyviridae        | Plants        |
| NC_012931 | Wheat yellow dwarf virus-GPV            | NA           | Triticum aestivum                                   | NA    | Pisoniviricetes | Sobelivirales   | Solemoviridae      | Plants        |
| NC_002350 | Wheat yellow mosaic virus               | NA           | NA                                                  | RNA 1 | Stelpaviricetes | Patatavirales   | Potyviridae        | Plants        |
| NC_002349 | Wheat yellow mosaic virus               | NA           | NA                                                  | RNA 2 | Stelpaviricetes | Patatavirales   | Potyviridae        | Plants        |
| NC_008516 | White bream virus                       | DF24/00      | Blicca bjoerkna L.                                  | NA    | Pisoniviricetes | Nidovirales     | Tornidovirineae    | Vertebrates   |
| NC_031747 | White clover mottle virus               | CD           | Trifolium repens                                    | NA    | Pisoniviricetes | Sobelivirales   | Solemoviridae      | Plants        |
| NC_016991 | White-eye coronavirus HKU16             | HKU16-6847   | white-eye                                           | NA    | Pisoniviricetes | Nidovirales     | Cornidovirineae    | Vertebrates   |
| NC_016995 | Wigeon coronavirus HKU20                | HKU20-9243   | wigeon                                              | NA    | Pisoniviricetes | Nidovirales     | Cornidovirineae    | Vertebrates   |
| NC_035458 | Wild melon vein banding virus           | Su03-07      | Cucumis melo var. agrestis                          | NA    | Stelpaviricetes | Patatavirales   | Potyviridae        | Plants        |
| NC_030391 | Wild onion symptomless virus            | TUR256-1     | Wild onion                                          | NA    | Stelpaviricetes | Patatavirales   | Potyviridae        | Plants        |
| NC_004426 | Wild potato mosaic virus                | Type Isolate | NA                                                  | NA    | Stelpaviricetes | Patatavirales   | Potyviridae        | Plants        |
| NC_009744 | Wild tomato mosaic virus                | Laichau      | Solanum torvum (wild tomato)                        | NA    | Stelpaviricetes | Patatavirales   | Potyviridae        | Plants        |
| NC_007216 | Wisteria vein mosaic virus              | Beijing      | Wisteria                                            | NA    | Stelpaviricetes | Patatavirales   | Potyviridae        | Plants        |
| NC_026811 | Wobbly possum disease virus             | WPDV         | Trichosurus vulpecula (Australian brushtail possum) | NA    | Pisoniviricetes | Nidovirales     | Arnidovirineae     | Vertebrates   |
| NC_046957 | Wuhan japanese halfbeak arterivirus     | DSYS15584    | Hyporhamphus sajori                                 | NA    | Pisoniviricetes | Nidovirales     | Nanidovirineae     | Vertebrates   |
| NC_043490 | Xinzhou nematode virus 6                | XZSJSC61041  | snake-associated nematodes                          | NA    | Pisoniviricetes | Nidovirales     | Tornidovirineae    | Vertebrates   |
| NC_040360 | Yado-kari virus 1                       | 2-W1032/56   | NA                                                  | NA    | Yadokarivirales | Yadokariviridae | Alphayadokarivirus | Fungi         |
| NC_029854 | Yak enterovirus                         | SWUN-AB001   | yaks                                                | NA    | Pisoniviricetes | Picornavirales  | Picornaviridae     | Vertebrates   |
| NC_016441 | Yambean mosaic virus                    | SR           | yam bean                                            | NA    | Stelpaviricetes | Patatavirales   | Potyviridae        | Plants        |
| NC_055491 | Yam chlorotic necrosis virus            | YCNV-YJish   | Dioscorea sp.                                       | NA    | Stelpaviricetes | Patatavirales   | Potyviridae        | Plants        |
| NC_038561 | Yam chlorotic necrotic mosaic virus     | YS           | Dioscorea parviflora                                | NA    | Stelpaviricetes | Patatavirales   | Potyviridae        | Plants        |
| NC_019412 | Yam mild mosaic virus                   | NA           | Dioscorea trifida                                   | NA    | Stelpaviricetes | Patatavirales   | Potyviridae        | Plants        |
| NC_004752 | Yam mosaic virus                        | Ivory Coast  | NA                                                  | NA    | Stelpaviricetes | Patatavirales   | Potyviridae        | Plants        |
| NC_048215 | Yellow head virus                       | 20120706     | Fenneropenaeus chinensis                            | NA    | Pisoniviricetes | Nidovirales     | Ronidovirineae     | Invertebrates |



|            |                                     |                        |                                          |    |                 |                |                 |               |
|------------|-------------------------------------|------------------------|------------------------------------------|----|-----------------|----------------|-----------------|---------------|
| NC_043505  | Yellow head virus                   | Chachoengsao 1998      | Penaeus monodon                          | NA | Pisoniviricetes | Nidovirales    | Ronidovirineae  | Invertebrates |
| NC_024471  | Yellow oat grass mosaic virus       | YOgMV-Sb               | Trisetum flavescens L. (Yellow oatgrass) | NA | Stelpaviricetes | Patatavirales  | Potyviridae     | Plants        |
| NC_040534  | Yichang virus                       | HB-MLV                 | Culex sp. (mosquito)                     | NA | Pisoniviricetes | Nidovirales    | Mesnidovirineae | Invertebrates |
| NC_040587  | Yongsan iflavivirus 1               | A16.2047/ROK/2016      | Culex pipiens                            | NA | Pisoniviricetes | Picornavirales | Iflaviridae     | Invertebrates |
| NC_040584  | Yongsan picorna-like virus 3        | YPLV3/16-0052/ROK/2016 | Aedes vexans nipponii                    | NA | Pisoniviricetes | Picornavirales |                 | Invertebrates |
| NC_040654  | Yongsan picorna-like virus 4        | 16-0128/ROK/2016       | Aedes vexans nipponii                    | NA | Pisoniviricetes | Picornavirales |                 | Invertebrates |
| NC_048209  | Zambian malbrouck virus 1           | SHFVagmMal_se qID_01   | Chlorocebus sp.                          | NA | Pisoniviricetes | Nidovirales    | Arnidovirineae  | Vertebrates   |
| NC_011560  | Zantedeschia mild mosaic virus      | TW                     | Zantedeschia spp. (calla lily)           | NA | Stelpaviricetes | Patatavirales  | Potyviridae     | Plants        |
| NC_043172  | Zucchini shoestring virus           | RSA Patty pan          | Cucurbita pepo                           | NA | Stelpaviricetes | Patatavirales  | Potyviridae     | Plants        |
| NC_023175  | Zucchini tigre mosaic virus         | Re01-25                | Momordica charantia                      | NA | Stelpaviricetes | Patatavirales  | Potyviridae     | Plants        |
| NC_003224  | Zucchini yellow mosaic virus        | TW-TN3                 | Luffa cylindrica Roem.                   | NA | Stelpaviricetes | Patatavirales  | Potyviridae     | Plants        |
| AB006531   | Plautia stali intestine virus       | NA                     | Plautia stali                            | NA | Pisoniviricetes | Picornavirales | Dicistroviridae | Invertebrates |
| AF014388   | Drosophila C virus                  | EB                     | NA                                       | NA | Pisoniviricetes | Picornavirales | Dicistroviridae | Invertebrates |
| AF022937   | Rhopalosiphum padi virus            | NA                     | NA                                       | NA | Pisoniviricetes | Picornavirales | Dicistroviridae | Invertebrates |
| AB000906   | Infectious flacherie virus          | NA                     | NA                                       | NA | Pisoniviricetes | Picornavirales | Iflaviridae     | Invertebrates |
| AB017037   | Himetobi P virus                    | NA                     | Laodelphax striatellus                   | NA | Pisoniviricetes | Picornavirales | Dicistroviridae | Invertebrates |
| AF092924   | Sacbrood virus                      | Rothamstead            | NA                                       | NA | Pisoniviricetes | Picornavirales | Iflaviridae     | Invertebrates |
| AF178440   | Triatoma virus                      | NA                     | Triatoma infestans                       | NA | Pisoniviricetes | Picornavirales | Dicistroviridae | Invertebrates |
| AF183905   | Black queen cell virus              | South African          | Apis mellifera                           | NA | Pisoniviricetes | Picornavirales | Dicistroviridae | Invertebrates |
| AF218039   | Cricket paralysis virus             | NA                     | NA                                       | NA | Pisoniviricetes | Picornavirales | Dicistroviridae | Invertebrates |
| AF150629   | Acute bee paralysis virus           | NA                     | Apis mellifera                           | NA | Pisoniviricetes | Picornavirales | Dicistroviridae | Invertebrates |
| AF277675   | Taura syndrome virus                | NA                     | Penaeus vannamei                         | NA | Pisoniviricetes | Picornavirales | Dicistroviridae | Invertebrates |
| AF323747   | Perina nuda virus                   | NA                     | NA                                       | NA | Pisoniviricetes | Picornavirales | Iflaviridae     | Invertebrates |
| AF469603   | Sacbrood virus                      | NA                     | NA                                       | NA | Pisoniviricetes | Picornavirales | Iflaviridae     | Invertebrates |
| AF536531   | Aphid lethal paralysis virus        | NA                     | NA                                       | NA | Pisoniviricetes | Picornavirales | Dicistroviridae | Invertebrates |
| AY275710   | Kashmir bee virus                   | NA                     | NA                                       | NA | Pisoniviricetes | Picornavirales | Dicistroviridae | Invertebrates |
| AY292384   | Deformed wing virus                 | PA                     | NA                                       | NA | Pisoniviricetes | Picornavirales | Iflaviridae     | Invertebrates |
| AY341824   | Ectropis obliqua picorna-like virus | NA                     | NA                                       | NA | Pisoniviricetes | Picornavirales | Iflaviridae     | Invertebrates |
| AY152711S1 | Sacbrood virus                      | Riez2002               | NA                                       | NA | Pisoniviricetes | Picornavirales | Iflaviridae     | Invertebrates |
| AF486072   | Acute bee paralysis virus           | Hungary 1              | Apis mellifera                           | NA | Pisoniviricetes | Picornavirales | Dicistroviridae | Invertebrates |
| AY365064   | Ectropis obliqua picorna-like virus | NA                     | Ectropis obliqua                         | NA | Pisoniviricetes | Picornavirales | Iflaviridae     | Invertebrates |
| AY224602   | Deformed wing virus                 | NA                     | NA                                       | NA | Pisoniviricetes | Picornavirales | Iflaviridae     | Invertebrates |
| AB070959   | Kakugo virus                        | NA                     | Apis mellifera                           | NA | Pisoniviricetes | Picornavirales | Iflaviridae     | Invertebrates |
| AB183472   | Himetobi P virus                    | Izumo                  | NA                                       | NA | Pisoniviricetes | Picornavirales | Dicistroviridae | Invertebrates |
| AY590471   | Taura syndrome virus                | Belize                 | NA                                       | NA | Pisoniviricetes | Picornavirales | Dicistroviridae | Invertebrates |
| AY634314   | Solenopsis invicta virus 1          | NA                     | Solenopsis invicta                       | NA | Pisoniviricetes | Picornavirales | Dicistroviridae | Invertebrates |
| AY251269   | Varroa destructor virus 1           | NA                     | Varroa destructor mites                  | NA | Pisoniviricetes | Picornavirales | Iflaviridae     | Invertebrates |
| AY997025   | Taura syndrome virus                | Th04Lv                 | Litopenaeus vannamei                     | NA | Pisoniviricetes | Picornavirales | Dicistroviridae | Invertebrates |
| DQ104696   | Taura syndrome virus                | ZHZC3TSV               | Penaeus vannamei                         | NA | Pisoniviricetes | Picornavirales | Dicistroviridae | Invertebrates |
| AJ489744   | Deformed wing virus                 | NA                     | Apis mellifera                           | NA | Pisoniviricetes | Picornavirales | Iflaviridae     | Invertebrates |
| DQ112227   | Kelp fly virus                      | NA                     | Chaetocoelopa sydneyensis                | NA | Pisoniviricetes | Picornavirales |                 | Invertebrates |
| DQ212790   | Taura syndrome virus                | NA                     | NA                                       | NA | Pisoniviricetes | Picornavirales | Dicistroviridae | Invertebrates |
| DQ288865   | Homalodisca coagulata virus 1       | NA                     | NA                                       | NA | Pisoniviricetes | Picornavirales | Dicistroviridae | Invertebrates |
| DQ224278   | Deformed wing virus                 | AUSTRIA-1              | NA                                       | NA | Pisoniviricetes | Picornavirales | Iflaviridae     | Invertebrates |
| EF219380   | Israeli acute paralysis virus       | NA                     | NA                                       | NA | Pisoniviricetes | Picornavirales | Dicistroviridae | Invertebrates |
| EF517277   | Brevicoryne brassicae virus - UK    | NA                     | Brevicoryne brassicae                    | NA | Pisoniviricetes | Picornavirales | Iflaviridae     | Invertebrates |
| EF428566   | Solenopsis invicta virus 2          | NA                     | Solenopsis invicta (fire ant)            | NA | Pisoniviricetes | Picornavirales | Polycipiviridae | Invertebrates |
| EF517505   | Black queen cell virus              | AUSTRIA-5              | NA                                       | NA | Pisoniviricetes | Picornavirales | Dicistroviridae | Invertebrates |
| EF517515   | Black queen cell virus              | HUNGARY-10             | NA                                       | NA | Pisoniviricetes | Picornavirales | Dicistroviridae | Invertebrates |
| EF517519   | Black queen cell virus              | POLAND-4               | NA                                       | NA | Pisoniviricetes | Picornavirales | Dicistroviridae | Invertebrates |

|          |                               |                       |                     |    |                 |                |                 |               |
|----------|-------------------------------|-----------------------|---------------------|----|-----------------|----------------|-----------------|---------------|
| EU035616 | Slow bee paralysis virus      | Rothamsted            | NA                  | NA | Pisoniviricetes | Picornavirales | Iflaviridae     | Invertebrates |
| EU436423 | Israeli acute paralysis virus | DVE31-OP3-PA-USA-2007 | NA                  | NA | Pisoniviricetes | Picornavirales | Dicistroviridae | Invertebrates |
| EU436455 | Israeli acute paralysis virus | ISI-ISRAEL-2007       | NA                  | NA | Pisoniviricetes | Picornavirales | Dicistroviridae | Invertebrates |
| EU436456 | Israeli acute paralysis virus | OZ6-AUSTRALIA-2007    | NA                  | NA | Pisoniviricetes | Picornavirales | Dicistroviridae | Invertebrates |
| EU868609 | Infectious flacherie virus    | Zhejiang01/CHN        | Bombyx mori         | NA | Pisoniviricetes | Picornavirales | Iflaviridae     | Invertebrates |
| FJ790488 | Nasonia vitripennis virus     | 3                     | Nasonia vitripennis | NA | Pisoniviricetes | Picornavirales | Iflaviridae     | Invertebrates |
